# Supplementary material
Source: PubMed Central journal article supplement (PMC9531079)
Supplement: jamapediatr-e223611-s001.pdf [file jamapediatr-e223611-s001.pdf]

## Supplemental Online Content

Tripathi S, Nadiger M, McGarvey JS, et al; Society of Critical Care Medicine Discovery Viral Infection and Respiratory Illness Universal Study (VIRUS): COVID-19 Registry Investigator Group. Association of early steroid administration with outcomes of children hospitalized for COVID-19 without multisystem inflammatory syndrome in children. *JAMA Pediatr*. Published online October 3, 2022. doi:10.1001/jamapediatrics.2022.3611

**eMethods.** Other measured variables and confounders

**eReferences**

**eAppendix.** Propensity score matched analysis

**eTable 1.** Laboratory values

**eTable 2.** Hospital length of the supplementary analysis

**eTable 3.** Logistic regression of secondary outcomes

**eTable 4.** Bivariate comparison of rare secondary outcomes

This supplemental material has been provided by the authors to give readers additional information about their work.

## **eMethods: Other measured variables and confounders**

Race and ethnicity were self-reported separately. These were later categorized as composite index as non-Hispanic Asian, non-Hispanic black, non-Hispanic White, non-Hispanic others, and Hispanic as per the current CDC reporting on race/ethnicity disparities pertaining to COVID-19<sup>1</sup>. Race was included in the regression models as a proxy variable for socioeconomic disparities. However, due to some categories occurring infrequently, and in order to reduce the total number of parameters that would need to be estimated by the model with a limited sample size, race and ethnicity were collapsed into 2 categories (non-Hispanic white vs other).

Inotrope/vasopressor included patients who received any predefined inotrope/vasopressor on any hospital day from day 0 to 14. Pediatric Risk of Mortality (PRISM III)<sup>2</sup> was determined using the online calculator if the summative score was not already entered by the individual site<sup>3</sup>.

Patients' temperature was entered into the REDCap database on days 0-3, 7, 14, and 21. We defined fever as a temperature > 38°C. Besides steroids, other medication use assessed for this study included hydroxychloroquine, azithromycin, therapeutic anticoagulation, vitamin C, vitamin D, zinc, aspirin, convalescent plasma, IVIG, and biological agents. For descriptive analysis, medication was counted as administered if entered as given on any day of the hospitalization (days 0-14, day 21, and day 28). Only remdesivir administration on or prior to day 2 of admission was included as a confounder in the regression model.

The VIRUS database allows daily lab entries for days 0-3, 7, 14, and 21. For this analysis, the following inflammatory and other laboratory parameters were assessed: White cell count, platelet count, C-reactive protein, procalcitonin, ferritin, serum glutamic oxaloacetic transaminase (SGOT), serum glutamic pyruvic transaminase (SGPT), serum albumin,

interleukin-6, brain natriuretic peptide (BNP), Pro-BNP, fibrinogen, D-dimer and lactate dehydrogenase (LDH). Maximum serum creatinine on days 1, 2, 3, 7, 14, and 21 were also obtained. They were then categorized as normal and abnormal based on standard cutoff levels.<sup>4</sup> Estimated GFR (eGFR) was calculated based on the bedside Schwartz equation.<sup>5</sup> Patients who required invasive respiratory or hemodynamic support during hospitalization were classified as having a critical illness.<sup>6</sup>

## eReferences

1. CDC. COVID Data Tracker. Department of Health and Human Services. Accessed April 1st, 2021. <https://covid.cdc.gov/covid-data-tracker/#demographics>
2. Pollack MM, Patel KM, Ruttimann UE. PRISM III: an updated Pediatric Risk of Mortality score. *Critical care medicine*. 1996;24(5):743-752.
3. CPCCRN. PRISM III Calculator. Collaborative Pediatric Critical Care Research Network, . 2020. Accessed Sept 13, 2020, 2020. <https://www.cpccrn.org/calculators/prismiicalculator/>
4. Mayo Clinic Laboratories. Test Catalog. Mayo Clinic. Accessed 12/24/2021, 2021. <https://www.mayocliniclabs.com/test-catalog>
5. National Kidney Foundation. Creatinine based bedside Schwartz equation. Accessed 12/24/2021, 2021. <https://www.kidney.org/content/creatinine-based-%E2%80%9Cbedside-schwartz%E2%80%9D-equation-2009>
6. Tripathi S, Gist K, Bjornstad E, Kashyap R, Boman K. COVID-19 Associated Pediatric ICU Admissions: A Report from the SCCM Discovery Network VIRUS Registry. *Pediatric Critical Care Medicine*. 2021;In Press

## **eAppendix: Propensity Score Matched analysis**

### 2.1 Propensity Score Matching

A nearest neighbor based propensity score matching algorithm was used to match steroid treated and control patients on number of abnormal inflammatory mediators, remdesivir treatment, treatment outside the US, WHO ordinal score of  $\geq 4$  or ICU admission  $\leq 2$  days, Bacterial or viral coinfection on admission, comorbidity or obesity, ethnicity and age resulting in 184 patients per group. A threshold of 0.1 was used to judge balance using the standardized mean difference for continuous variables and the difference in proportions for binary variables. All matching variables fell under this threshold except Remdesivir treatment so it was included as a covariate with steroid treatment within 2 days in a mixed linear regression on log transformed hospital LOS with site included as a random intercept. The results found no significant effect for steroid treatment (exp coef = 1.04, 95% CI = 0.88, 1.24,  $p = 0.627$ ). Steroid treated patients had an expected geometric mean hospital LOS of 4.41 days (95% CI = 3.44, 5.59) compared to 4.19 days (95% CI = 3.30, 5.27) in the control group. Remdesivir treatment was significantly associated with longer LOS (exp coef = 1.89, 95% CI = 1.53, 2.32,  $p < 0.001$ ).

### 2.2 Inverse Probability Treatment Weights

Average treatment effect among the treated (ATT) inverse probability treatment weights (IPTW) were calculated based on the propensity score for treatment using the same predictors used for propensity score matching. Weights were trimmed at the 1st and 99th percentile, meaning weights below the 1st percentile were replaced with the 1st percentile and weights above the 99th percentile were set at the 99th percentile. The weights were incorporated into a linear mixed effects model using the log transformed hospital LOS as the outcome and steroid treatment as the

predictor with a random intercept for site. The results found no significant effect for steroid treatment (exp coef = 1.06, 95% CI = 0.96, 1.18, p = 0.24). Steroid treated patients had an expected geometric mean hospital LOS of 5.77 days (95% CI = 4.55, 7.25) compared to 5.37 days (95% CI = 4.24, 6.74) in the control group.

**eTable 1: Inflammatory mediators and other laboratory parameters on admission**

|                                           | Category         | Unit/Normal value cutoffs | Total Cohort                   | No steroids                   | Yes Steroids                  | P value |
|-------------------------------------------|------------------|---------------------------|--------------------------------|-------------------------------|-------------------------------|---------|
| <b>Continuous</b>                         |                  |                           |                                |                               |                               |         |
| 1                                         | White cell count | X 10 <sup>9</sup> cells/L | 8.5 (5.4, 12.6)<br>n = 473     | 8.5 (5.4, 12.6)<br>n = 368    | 8.2 (5.4, 13.4)<br>n = 105    | 0.74    |
| 2                                         | Platelet count   | X 10 <sup>9</sup> cells/L | 260 (193.5, 345.7)<br>n = 512  | 269 (206, 363)<br>n = 397     | 209 (157, 291)<br>n = 115     | <0.001  |
| 3                                         | CRP              | mg/L                      | 5.1 (1.5, 25.3)<br>n = 318     | 4.5 (1.5, 21.6)<br>n = 236    | 4.5 (2.0, 40.1)<br>n = 82     | 0.03    |
| 4                                         | Pro-calcitonin   | ng/mL                     | 0.14 (0.07, 0.45)<br>n = 200   | 0.14 (0.07, 0.53)<br>n = 150  | 0.11 (0.05, 0.35)<br>n = 50   | 0.13    |
| 5                                         | Ferritin         | mcg/L                     | 135.5 (51.4, 349.7)<br>n = 156 | 130.5 (50.9, 328.7) n = 102   | 147.5 (55.0, 449.7)<br>n = 54 | 0.41    |
| 6                                         | AST              | U/L                       | 38 (26.2, 56.7)<br>n = 421     | 38 (28, 56)<br>n = 315        | 35.5 (24.5, 60)<br>n = 106    | 0.29    |
| 7                                         | ALT              | U/L                       | 26 (17, 44)<br>n = 424         | 26 (17, 42)<br>n = 316        | 27 (16.2, 55.5)<br>n = 108    | 0.72    |
| 8                                         | Serum albumin    | g/dL                      | 4 (3.5, 4.4)<br>n = 415        | 4 (3.5, 4.4)<br>n = 309       | 3.8 (3.2, 4.2)<br>n = 106     | 0.02    |
| 9                                         | IL-6             | pg/mL                     | 6.4 (3.9, 15)<br>n = 28        | 5.4 (3.6, 15)<br>n = 19       | 7 (4.5, 54.8)<br>n = 9        | 0.47    |
| 10                                        | BNP              | pg/mL                     | 20.7 (10, 85)<br>n = 58        | 32.5 (10.7, 93.5)<br>n = 34   | 15.5 (10, 46)<br>n = 24       | 0.16    |
| 11                                        | NT Pro BNP       | pg/mL                     | 173.5 (32.5, 949.2)<br>n = 48  | 224 (38, 776)<br>n = 30       | 93.6 (14.3, 1007.2)<br>n = 18 | 0.44    |
| 12                                        | Fibrinogen       | mg/dL                     | 324 (254, 471)<br>n = 114      | 310 (243, 447)<br>n = 73      | 388 (271.5, 535.5)<br>n = 41  | 0.07    |
| 13                                        | D-dimer          | mcg/mL                    | 0.56 (0.29, 1.38)<br>n = 177   | 0.60 (0.30, 1.61)<br>n = 107  | 0.52 (0.27, 0.94)<br>n = 70   | 0.33    |
| 14                                        | LDH              | U/L                       | 346.5 (244.5, 595.7) n = 126   | 330 (238.7, 627)<br>n = 86    | 359 (257.5, 544.7)<br>n = 40  | 0.81    |
| 15                                        | eGFR             | mL/min/1.73m <sup>2</sup> | 93.4 (76.9, 120.6)<br>n = 436  | 94.6 (76.6, 122.2)<br>n = 338 | 91.8 (79.3, 113.1)<br>n = 98  | 0.58    |
| <b>Categorical ( Percentage abnormal)</b> |                  |                           |                                |                               |                               |         |
| 1                                         | White cell count | Age-based*                | 222/473 (46.9%)                | 176/368 (47.8%)               | 46/105 (43.8%)                | 0.47    |
| 2                                         | Platelet count   | Age-based*                | 151/512 (29.4%)                | 115/397 (28.9%)               | 36/115 (31.3%)                | 0.62    |
| 3                                         | CRP              | ≤ 8 mg/L                  | 139/318 (43.7%)                | 94/236 (39.8%)                | 45/82 (54.8%)                 | 0.01    |
| 4                                         | Pro-calcitonin   | ≤ 0.15                    | 94/200 (47.0%)                 | 73/151 (48.3%)                | 21/52 (40.04%)                | 0.32    |
| 5                                         | Ferritin         | < 336                     | 40/156 (25.6%)                 | 24/102 (23.5%)                | 16/54 (29.6%)                 | 0.40    |
| 6                                         | AST              | Age-based*                | 115/421 (27.3%)                | 84/315 (26.6%)                | 31/106 (29.3%)                | 0.60    |
| 7                                         | ALT              | Age-based*                | 116/424 (27.3%)                | 82/316 (25.9%)                | 34/108 (31.4%)                | 0.26    |
| 8                                         | Serum albumin    | ≥3.5 g/dL                 | 102/415 (24.5%)                | 65/309 (21.0%)                | 37/106 (34.9%)                | 0.004   |
| 9                                         | IL-6             | ≤ 1.8 pg/mL               | 27/28 (96.4%)                  | 19/19 (100%)                  | 8/9 (88.9%)                   | 0.32    |
| 10                                        | BNP              | <100 pg/mL**              | 11/58 (18.9%)                  | 7/34 (20.6%)                  | 4/24 (16.7%)                  | >0.99   |
| 11                                        | NT Pro BNP       | < 140 pg/mL*              | 25/48 (52.0%)                  | 18/30 (60.0%)                 | 7/18 (38.9%)                  | 0.15    |

|    | Category          | Unit/Normal value cutoffs | Total Cohort    | No steroids    | Yes Steroids  | P value |
|----|-------------------|---------------------------|-----------------|----------------|---------------|---------|
|    | <b>Continuous</b> |                           |                 |                |               |         |
| 12 | Fibrinogen        | 200-393*                  | 53/114 (46.5%)  | 32/73 (43.8%)  | 21/41 (51.2%) | 0.44    |
| 13 | D-dimer           | <0.25                     | 142/177 (80.2%) | 86/107 (80.3%) | 56/70 (80.0%) | 0.95    |
| 14 | LDH               | Age-based*                | 69/126 (54.7%)  | 45/86 (52.3%)  | 24/40 (60.0%) | 0.44    |

Missing/not done Leukocyte count 690 (59.3%), Missing/not done platelets 651 (56.0%), Missing/not done CRP 845 (72.7%), Missing/not done pro calcitonin 963 (82.8%), Missing/not done ferritin 1007 (86.6%), Missing/not done AST 742 (63.8%), Missing/not done ALT 739 (63.5%), Missing/not done serum albumin 748 (64.3%), Missing/not done interleukin 6 1135 (97.6%), Missing/not done BNP 1105 (95.0%), Missing/not done NT BNP 1115 (95.9%), Missing/not done fibrinogen 1049 (90.2%), Missing/not done d-dimer 986 (84.8%), Missing/not done LDH 1037 (89.2%).

Values represent median (interquartile range) or frequency (percentage) as appropriate.

\*Reference: <https://www.mayocliniclabs.com/test-catalog>. Date accessed 09/22/2021.

\*\*Neves AL, Henriques-Coelho T, Leite-Moreira A, Areias JC. The Utility of Brain Natriuretic Peptide in Pediatric Cardiology: A Review. *Pediatr Crit Care Med*. 2016 Nov;17(11):e529-e538. doi: 10.1097/PCC.0000000000000966. PMID: 27749513.

**eTable 2: Supplemental multiple regression analysis of hospital length of stay**

| Variable                                                                                                                                      | Exp coef | 95% C.I    | P value            | R     |
|-----------------------------------------------------------------------------------------------------------------------------------------------|----------|------------|--------------------|-------|
| <b>Only including patients with LOS <math>\geq</math> 2 days<sup>a</sup> (N=729)</b>                                                          |          |            |                    |       |
| Steroid treatment $\leq$ 2 days                                                                                                               | 0.93     | 0.78, 1.11 | 0.414              | 0.030 |
| Number of abnormal inflammatory mediators                                                                                                     | 1.05     | 1.00, 1.09 | 0.042              | 0.081 |
| Non-US site                                                                                                                                   | 1.75     | 1.35, 2.26 | < 0.001            | 0.230 |
| Remdesivir treatment $\leq$ 2 days                                                                                                            | 1.06     | 0.88, 1.28 | 0.515              | 0.024 |
| Bacterial or viral coinfection at admission                                                                                                   | 1.20     | 1.03, 1.41 | 0.022              | 0.083 |
| WHO ordinal scale $\geq$ 4 or ICU admission within $\leq$ 2 days                                                                              | 1.24     | 1.10, 1.38 | < 0.001            | 0.138 |
| Obesity or comorbidity                                                                                                                        | 1.14     | 1.02, 1.28 | 0.025              | 0.085 |
| Not White non-Hispanic race                                                                                                                   | 0.96     | 0.86, 1.06 | 0.408              | 0.030 |
| Age                                                                                                                                           | 1.01     | 1.00, 1.02 | 0.012              | 0.091 |
| Steroid treatment $\leq$ 2 days *number of abnormal inflammatory mediators                                                                    | 1.07     | 1.00, 1.15 | 0.036 <sup>d</sup> | 0.077 |
| <b>Only Including patients with WHO Ordinal Score <math>\geq</math> 4 on admission (respiratory support on admission)<sup>b</sup> (N=286)</b> |          |            |                    |       |
| Steroid treatment $\leq$ 2 days                                                                                                               | 1.16     | 0.91, 1.47 | 0.237              | 0.067 |
| Number of abnormal inflammatory mediators                                                                                                     | 1.20     | 1.11, 1.29 | < 0.001            | 0.277 |
| Non-US site                                                                                                                                   | 1.89     | 1.15, 3.10 | 0.013              | 0.202 |
| Remdesivir treatment $\leq$ 2 days                                                                                                            | 1.26     | 1.00, 1.59 | 0.051              | 0.109 |
| Bacterial or viral coinfection at admission                                                                                                   | 1.19     | 0.92, 1.53 | 0.189              | 0.074 |
| ICU admission within $\leq$ 2 days                                                                                                            | 1.26     | 1.04, 1.51 | 0.018              | 0.132 |
| Obesity or comorbidity                                                                                                                        | 1.01     | 0.81, 1.26 | 0.936              | 0.004 |
| Not White non-Hispanic race                                                                                                                   | 1.02     | 0.84, 1.25 | 0.827              | 0.012 |
| Age                                                                                                                                           | 1.01     | 0.99, 1.02 | 0.222              | 0.066 |
| Steroid treatment $\leq$ 2 days *number of abnormal inflammatory mediators                                                                    | 0.96     | 0.88, 1.05 | 0.381              | 0.049 |
| <b>Patients with Missing MIS-C Diagnosis Excluded (N = 1003)<sup>c</sup></b>                                                                  |          |            |                    |       |
| Steroid treatment $\leq$ 2 days                                                                                                               | 0.95     | 0.82, 1.11 | 0.513              | 0.020 |
| Number of abnormal inflammatory mediators                                                                                                     | 1.10     | 1.06, 1.15 | < 0.001            | 0.152 |
| Non-US site                                                                                                                                   | 2.20     | 1.62, 3.00 | < 0.001            | 0.272 |
| Remdesivir treatment $\leq$ 2 days                                                                                                            | 1.26     | 1.05, 1.52 | 0.013              | 0.075 |
| Bacterial or viral coinfection at admission                                                                                                   | 1.20     | 1.04, 1.38 | 0.011              | 0.077 |
| WHO ordinal scale $\geq$ 4 or ICU admission within $\leq$ 2 days                                                                              | 1.47     | 1.33, 1.62 | < 0.001            | 0.224 |
| Obesity or comorbidity                                                                                                                        | 1.21     | 1.09, 1.34 | < 0.001            | 0.110 |
| Not White non-Hispanic race                                                                                                                   | 0.98     | 0.89, 1.08 | 0.699              | 0.012 |
| Age                                                                                                                                           | 1.01     | 1.00, 1.02 | 0.002              | 0.093 |
| Steroid treatment $\leq$ 2 days *number of abnormal inflammatory mediators                                                                    | 1.04     | 0.97, 1.11 | 0.259              | 0.034 |

<sup>a</sup> R<sup>2</sup> 15.4%, <sup>b</sup> R<sup>2</sup> 24.8%, <sup>c</sup> R<sup>2</sup> 25.1

<sup>d</sup>The significant positive interaction between steroids and the number of inflammatory mediators in patients with length of stay  $\geq$  2 days suggest that as the number of inflammatory mediators increase, the difference in length of stay between steroid and control patients would increase, with the steroid treated patients having a longer length of stay. To further analyze this association, a stratified analysis based on the number of abnormal inflammatory mediators (categorized as 0, 1, 2, 3 and 4+) was performed with inclusion of the categorized



number of abnormal inflammatory mediators instead of the numeric variable in the regression analysis. The results found a significant interaction **only** between steroid treatment and three abnormal inflammatory mediators (exp coefficient 1.83, 95% CI 1.18, 2.85,  $p=0.008$ ). Suggesting that the difference in length of stay between steroid and control patients is significantly greater when they have three abnormal inflammatory mediators compared to when they have zero abnormal inflammatory mediators; but not with any other number of abnormal inflammatory mediators. (Figure)

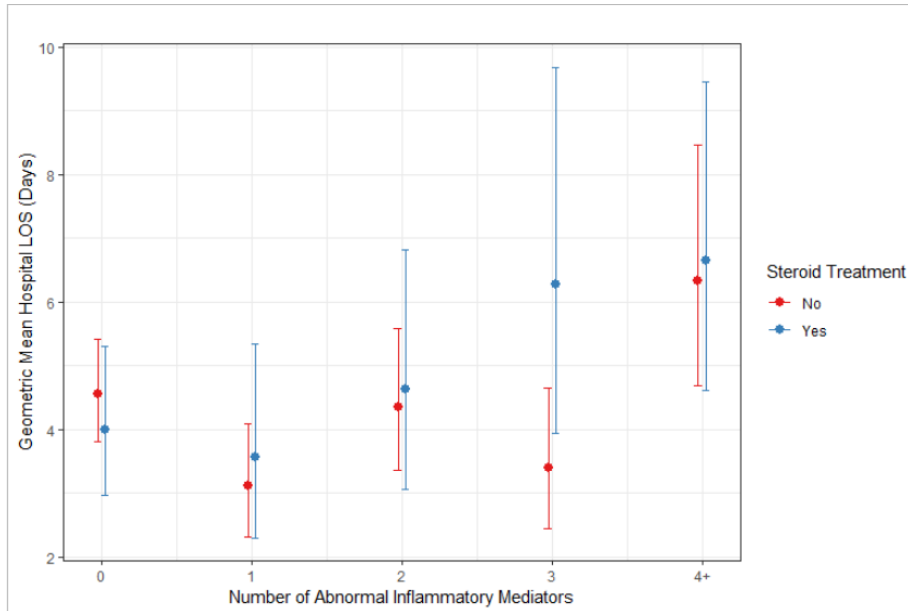

The impact was specific to three abnormal inflammatory mediators, which seems to be driving the overall interaction. It is possible that this association is due to presence of another variable which is not controlled in our analysis.

**eTable 3: Logistic Regression analysis for select secondary variables**

| Variable                                                              | aOdds ratio | 95% CI     | P value |
|-----------------------------------------------------------------------|-------------|------------|---------|
| <b><i>Fever Defervescence by day 3</i></b>                            |             |            |         |
| Steroid treatment ≤2 days                                             | 1.02        | 0.86, 1.21 | 0.830   |
| Number of abnormal inflammatory mediators                             | 1.04        | 1.01, 1.08 | 0.015   |
| Non-US site                                                           | 0.79        | 0.64, 0.97 | 0.028   |
| Remdesivir treatment ≤ 2 days                                         | 0.97        | 0.81, 1.16 | 0.746   |
| Bacterial or viral coinfection at admission                           | 1.07        | 0.93, 1.22 | 0.337   |
| WHO ordinal scale ≥ 4 or ICU admission within ≤ 2 days                | 1.00        | 0.89, 1.12 | 0.972   |
| Obesity or comorbidity                                                | 1.06        | 0.95, 1.19 | 0.285   |
| Not White non-Hispanic race                                           | 1.00        | 0.90, 1.12 | 0.952   |
| Age                                                                   | 0.98        | 0.98, 0.99 | < 0.001 |
| Steroid treatment ≤ 2 days *number of abnormal inflammatory mediators | 1.00        | 0.94, 1.06 | 0.905   |
| <b><i>Normalization of Inflammatory Mediators by day 3</i></b>        |             |            |         |
| Steroid treatment ≤2 days                                             | 1.03        | 0.84, 1.26 | 0.759   |
| Number of abnormal inflammatory mediators                             | 1.09        | 1.05, 1.13 | < 0.001 |
| Non-US site                                                           | 1.05        | 0.87, 1.27 | 0.620   |
| Remdesivir treatment ≤ 2 days                                         | 1.05        | 0.91, 1.21 | 0.531   |
| Bacterial or viral coinfection at admission                           | 1.06        | 0.95, 1.19 | 0.297   |
| WHO ordinal scale ≥ 4 or ICU admission within ≤ 2 days                | 1.05        | 0.95, 1.17 | 0.332   |
| Obesity or comorbidity                                                | 1.15        | 1.04, 1.28 | 0.009   |
| Not White non-Hispanic race                                           | 0.95        | 0.86, 1.05 | 0.309   |
| Age                                                                   | 1.01        | 1.00, 1.02 | 0.063   |
| Steroid treatment ≤ 2 days *number of abnormal inflammatory mediators | 1.00        | 0.94, 1.06 | 0.878   |

**eTable 4: Simple bivariate comparison of rare secondary outcome of Interest.**

| Variable                                                            | Steroid treatment |              | P value |
|---------------------------------------------------------------------|-------------------|--------------|---------|
|                                                                     | No (n= 979)       | Yes (n= 184) |         |
| Hospital mortality                                                  | 6 (0.61%)         | 5 (2.7%)     | 0.02    |
| Nosocomial bacterial infection <sup>a</sup>                         | 7 (0.72%)         | 2 (1.09%)    | 0.64    |
| Inotropes needed after D1 <sup>b</sup>                              | 5 (0.51%)         | 5 (2.7%)     | 0.01    |
| Hyperglycemia complication <sup>c</sup>                             | 11 (1.12%)        | 8 (4.3%)     | 0.005   |
| Noninvasive or invasive mechanical ventilation ≥ day 1 <sup>d</sup> | 10 (1.02%)        | 8 (4.3%)     | 0.004   |

<sup>a</sup> positive blood/urine, or respiratory culture ≥Day 2; <sup>b</sup> no inotropes requirement at admission day +1; <sup>c</sup> excluding patients with DKA; <sup>d</sup> no invasive or noninvasive ventilator requirement on admission day +1.
