# Supplementary material
Source: PubMed Central journal article supplement (PMC9531079)
Supplement: jamapediatr-e223611-s002.pdf [file jamapediatr-e223611-s002.pdf]

\*Indicates required information. Only first name, last name, and suffix will appear in PubMed.

| <b>*Group Name: The Society of Critical Care Medicine Discovery Viral Infection and Respiratory Illness Universal Study (VIRUS): COVID-19 Registry Investigator Group</b> |                   |                              |                  |                                                         |                                          |                                                         |                                                                                            |
|---------------------------------------------------------------------------------------------------------------------------------------------------------------------------|-------------------|------------------------------|------------------|---------------------------------------------------------|------------------------------------------|---------------------------------------------------------|--------------------------------------------------------------------------------------------|
| <b>*First Name and Middle Initial(s)</b>                                                                                                                                  | <b>*Last Name</b> | <b>*Suffix (eg, Jr, III)</b> | Academic Degrees | Institution                                             | Location (city, state/province, country) | Role or Contribution, eg, chair, principal investigator | Group (if more than 1 Group listed in the byline) and/or Subgroup (eg, Steering Committee) |
| Tanja                                                                                                                                                                     | Kovacevic         |                              |                  | University Hospital of Split (PEDS)                     | Split, Croatia                           | Non-author collaborator                                 |                                                                                            |
| Josko                                                                                                                                                                     | Markic            |                              |                  | University Hospital of Split (PEDS)                     | Split, Croatia                           | Non-author collaborator                                 |                                                                                            |
| Tatjana Capitovic                                                                                                                                                         | Ardalic           |                              |                  | University Hospital of Split (PEDS)                     | Split, Croatia                           | Non-author collaborator                                 |                                                                                            |
| Branka                                                                                                                                                                    | Polic             |                              |                  | University Hospital of Split (PEDS)                     | Split, Croatia                           | Non-author collaborator                                 |                                                                                            |
| Ivo                                                                                                                                                                       | Ivić              |                              |                  | University Hospital of Split (PEDS)                     | Split, Croatia                           | Non-author collaborator                                 |                                                                                            |
| Dominko                                                                                                                                                                   | Carev             |                              |                  | University Hospital of Split (PEDS)                     | Split, Croatia                           | Non-author collaborator                                 |                                                                                            |
| Robert                                                                                                                                                                    | Glavinic          |                              |                  | University Hospital of Split (PEDS)                     | Split, Croatia                           | Non-author collaborator                                 |                                                                                            |
| Girish                                                                                                                                                                    | Vadgaonkar        |                              |                  | BSES MG Hospital                                        | Mumbai, India                            | Non-author collaborator                                 |                                                                                            |
| Rekha                                                                                                                                                                     | Ediga             |                              |                  | BSES MG Hospital                                        | Mumbai, India                            | Non-author collaborator                                 |                                                                                            |
| Shilpa                                                                                                                                                                    | Basety            |                              |                  | BSES MG Hospital                                        | Mumbai, India                            | Non-author collaborator                                 |                                                                                            |
| Shwetha                                                                                                                                                                   | Dammareddy        |                              |                  | BSES MG Hospital                                        | Mumbai, India                            | Non-author collaborator                                 |                                                                                            |
| Phani Sreeharsha                                                                                                                                                          | Kasumalla         |                              |                  | BSES MG Hospital                                        | Mumbai, India                            | Non-author collaborator                                 |                                                                                            |
| Umamaheswara                                                                                                                                                              | Raju              |                              |                  | Gandhi Medical College and Hospital                     | Hyderabad, India                         | Non-author collaborator                                 |                                                                                            |
| Janaki                                                                                                                                                                    | Manduva           |                              |                  | Gandhi Medical College and Hospital                     | Hyderabad, India                         | Non-author collaborator                                 |                                                                                            |
| Naresh                                                                                                                                                                    | Kolakani          |                              |                  | Gandhi Medical College and Hospital                     | Hyderabad, India                         | Non-author collaborator                                 |                                                                                            |
| Shreeja                                                                                                                                                                   | Sripathi          |                              |                  | Gandhi Medical College and Hospital                     | Hyderabad, India                         | Non-author collaborator                                 |                                                                                            |
| Sheetal                                                                                                                                                                   | Chaitanya         |                              |                  | Gandhi Medical College and Hospital                     | Hyderabad, India                         | Non-author collaborator                                 |                                                                                            |
| Sridhar                                                                                                                                                                   | Papani            |                              |                  | Medicover Hospitals                                     | Hyderabad, India                         | Non-author collaborator                                 |                                                                                            |
| Mahesh                                                                                                                                                                    | Kamuram           |                              |                  | Medicover Hospitals                                     | Hyderabad, India                         | Non-author collaborator                                 |                                                                                            |
| Surapaneni Krishna                                                                                                                                                        | Mohan             |                              |                  | Panimalar Medical College Hospital & Research Institute | Chennai, India                           | Non-author collaborator                                 |                                                                                            |
| Ekambaram                                                                                                                                                                 | Jyothisree        |                              |                  | Panimalar Medical College Hospital & Research Institute | Chennai, India                           | Non-author collaborator                                 |                                                                                            |
| Mukur                                                                                                                                                                     | Petrolwala        |                              |                  | Tristar Hospital                                        | Surat, India                             | Non-author collaborator                                 |                                                                                            |
| Bharat                                                                                                                                                                    | Ladva             |                              |                  | Tristar Hospital                                        | Surat, India                             | Non-author collaborator                                 |                                                                                            |
| Yuki                                                                                                                                                                      | Itagaki           |                              |                  | Sapporo City General Hospital                           | Sapporo, Japan                           | Non-author collaborator                                 |                                                                                            |
| Akira                                                                                                                                                                     | Kodate            |                              |                  | Sapporo City General Hospital                           | Sapporo, Japan                           | Non-author collaborator                                 |                                                                                            |
| Reina                                                                                                                                                                     | Suzuki            |                              |                  | Sapporo City General Hospital                           | Sapporo, Japan                           | Non-author collaborator                                 |                                                                                            |
| Akira                                                                                                                                                                     | Kodate            |                              |                  | Sapporo City General Hospital                           | Sapporo, Japan                           | Non-author collaborator                                 |                                                                                            |
| Koyo                                                                                                                                                                      | Moriki            |                              |                  | Sapporo City General Hospital                           | Sapporo, Japan                           | Non-author collaborator                                 |                                                                                            |
| Fatimah                                                                                                                                                                   | Hassan-Hanga      |                              |                  | Aminu Kano Teaching Hospital/Bayero University          | Kano, Nigeria                            | Non-author collaborator                                 |                                                                                            |
| Hadiza                                                                                                                                                                    | Galadanci         |                              |                  | Aminu Kano Teaching Hospital/Bayero University          | Kano, Nigeria                            | Non-author collaborator                                 |                                                                                            |

## Supplemental Online Content: Nonauthor Collaborators

\*Indicates required information. Only first name, last name, and suffix will appear in PubMed.

| *First Name and Middle Initial(s) | *Last Name | *Suffix (eg, Jr, III) | Academic Degrees | Institution                                    | Location (city, state/province, country) | Role or Contribution, eg, chair, principal investigator | Group (if more than 1 Group listed in the byline) and/or Subgroup (eg, Steering Committee) |
|-----------------------------------|------------|-----------------------|------------------|------------------------------------------------|------------------------------------------|---------------------------------------------------------|--------------------------------------------------------------------------------------------|
| Abubakar Shehu                    | Gezawa     |                       |                  | Aminu Kano Teaching Hospital/Bayero University | Kano, Nigeria                            | Non-author collaborator                                 |                                                                                            |
| Halima M. S.                      | Kabara     |                       |                  | Aminu Kano Teaching Hospital/Bayero University | Kano, Nigeria                            | Non-author collaborator                                 |                                                                                            |
| Taiwo Gboluwaga                   | Amole      |                       |                  | Aminu Kano Teaching Hospital/Bayero University | Kano, Nigeria                            | Non-author collaborator                                 |                                                                                            |
| Halima                            | Kabir      |                       |                  | Aminu Kano Teaching Hospital/Bayero University | Kano, Nigeria                            | Non-author collaborator                                 |                                                                                            |
| Dalha Gwarzo                      | Haliru     |                       |                  | Aminu Kano Teaching Hospital/Bayero University | Kano, Nigeria                            | Non-author collaborator                                 |                                                                                            |
| Abdullahi S                       | Ibrahim    |                       |                  | Aminu Kano Teaching Hospital/Bayero University | Kano, Nigeria                            | Non-author collaborator                                 |                                                                                            |
| Muhammad Sohaib                   | Asghar     |                       |                  | Dow University Hospital                        | Karachi, Pakistan                        | Non-author collaborator                                 |                                                                                            |
| Mashaal                           | Syed       |                       |                  | Dow University Hospital                        | Karachi, Pakistan                        | Non-author collaborator                                 |                                                                                            |
| Syed Anosh Ali                    | Naqvi      |                       |                  | Dow University Hospital                        | Karachi, Pakistan                        | Non-author collaborator                                 |                                                                                            |
| Farah                             | Yasmin     |                       |                  | Dow University Hospital                        | Karachi, Pakistan                        | Non-author collaborator                                 |                                                                                            |
| Iftekhar                          | Ahmed      |                       |                  | Dow University Hospital                        | Karachi, Pakistan                        | Non-author collaborator                                 |                                                                                            |
| Sidra                             | Ishaque    |                       |                  | The Aga Khan University Hospital               | Karachi, Pakistan                        | Non-author collaborator                                 |                                                                                            |
| Ali Faisal                        | Saleem     |                       |                  | The Aga Khan University Hospital               | Karachi, Pakistan                        | Non-author collaborator                                 |                                                                                            |
| Mohammed A                        | Almazayad  |                       |                  | King Saud University                           | Riyadh, Saudi Arabia                     | Non-author collaborator                                 |                                                                                            |
| Mohammed I                        | Alarifi    |                       |                  | King Saud University                           | Riyadh, Saudi Arabia                     | Non-author collaborator                                 |                                                                                            |
| Jara M                            | Macarambon |                       |                  | King Saud University                           | Riyadh, Saudi Arabia                     | Non-author collaborator                                 |                                                                                            |
| Ahmad Abdullah                    | Bukhari    |                       |                  | King Saud University                           | Riyadh, Saudi Arabia                     | Non-author collaborator                                 |                                                                                            |
| Hussain A.                        | Albahrani  |                       |                  | King Saud University                           | Riyadh, Saudi Arabia                     | Non-author collaborator                                 |                                                                                            |
| Kazi N                            | Asfina     |                       |                  | King Saud University                           | Riyadh, Saudi Arabia                     | Non-author collaborator                                 |                                                                                            |
| Kaltham M                         | Aldossary  |                       |                  | King Saud University                           | Riyadh, Saudi Arabia                     | Non-author collaborator                                 |                                                                                            |
| Varsha                            | Gharpure   |                       |                  | Advocate Children's Hospital                   | Oak Park, Illinois, USA                  | Non-author collaborator                                 |                                                                                            |
| Walid                             | Malki      |                       |                  | Advocate Children's Hospital                   | Oak Park, Illinois, USA                  | Non-author collaborator                                 |                                                                                            |
| Paul                              | Cooper     |                       |                  | Advocate Children's Hospital                   | Oak Park, Illinois, USA                  | Non-author collaborator                                 |                                                                                            |
| Brenna                            | Kouzoukas  |                       |                  | Advocate Children's Hospital                   | Oak Park, Illinois, USA                  | Non-author collaborator                                 |                                                                                            |
| Nekaiya                           | Jacobs     |                       |                  | Advocate Children's Hospital                   | Oak Park, Illinois, USA                  | Non-author collaborator                                 |                                                                                            |
| Tejashree                         | Ganbote    |                       |                  | Advocate Children's Hospital                   | Oak Park, Illinois, USA                  | Non-author collaborator                                 |                                                                                            |
| Beryl                             | Valentine  |                       |                  | Advocate Children's Hospital                   | Oak Park, Illinois, USA                  | Non-author collaborator                                 |                                                                                            |
| Pavan                             | Sreerama   |                       |                  | Advocate Children's Hospital                   | Oak Park, Illinois, USA                  | Non-author collaborator                                 |                                                                                            |
| Vinod                             | Havalad    |                       |                  | Advocate Children's Hospital                   | Oak Park, Illinois, USA                  | Non-author collaborator                                 |                                                                                            |
| Suzanne                           | Barry      |                       |                  | Albany Medical Center                          | Albany, New York, USA                    | Non-author collaborator                                 |                                                                                            |

## Supplemental Online Content: Nonauthor Collaborators

\*Indicates required information. Only first name, last name, and suffix will appear in PubMed.

| *First Name and Middle Initial(s) | *Last Name | *Suffix (eg, Jr, III) | Academic Degrees | Institution                      | Location (city, state/province, country) | Role or Contribution, eg, chair, principal investigator | Group (if more than 1 Group listed in the byline) and/or Subgroup (eg, Steering Committee) |
|-----------------------------------|------------|-----------------------|------------------|----------------------------------|------------------------------------------|---------------------------------------------------------|--------------------------------------------------------------------------------------------|
| Christopher                       | Woll       |                       |                  | Albany Medical Center            | Albany, New York, USA                    | Non-author collaborator                                 |                                                                                            |
| Gregory                           | Wu         |                       |                  | Albany Medical Center            | Albany, New York, USA                    | Non-author collaborator                                 |                                                                                            |
| Erin                              | Carrole    |                       |                  | Albany Medical Center            | Albany, New York, USA                    | Non-author collaborator                                 |                                                                                            |
| Kathryn                           | Burke      |                       |                  | Albany Medical Center            | Albany, New York, USA                    | Non-author collaborator                                 |                                                                                            |
| Mustafa                           | Mohammed   |                       |                  | Albany Medical Center            | Albany, New York, USA                    | Non-author collaborator                                 |                                                                                            |
| Katherine                         | Irby       |                       |                  | Arkansas Children's Hospital     | Little Rock, Arkansas, USA               | Non-author collaborator                                 |                                                                                            |
| Ronald C.                         | Sanders    | Jr.                   |                  | Arkansas Children's Hospital     | Little Rock, Arkansas, USA               | Non-author collaborator                                 |                                                                                            |
| Glenda                            | Hefley     |                       |                  | Arkansas Children's Hospital     | Little Rock, Arkansas, USA               | Non-author collaborator                                 |                                                                                            |
| Amy B                             | Christie   |                       |                  | Atrium Health Navicent           | Macon, Georgia, USA                      | Non-author collaborator                                 |                                                                                            |
| Dennis W                          | Ashley     |                       |                  | Atrium Health Navicent           | Macon, Georgia, USA                      | Non-author collaborator                                 |                                                                                            |
| Rajani                            | Adiga      |                       |                  | Atrium Health Navicent           | Macon, Georgia, USA                      | Non-author collaborator                                 |                                                                                            |
| Jarrod M                          | Mosier     |                       |                  | Banner University Medical Center | Phoenix, Arizona, USA                    | Non-author collaborator                                 |                                                                                            |
| Karen                             | Lutrick    |                       |                  | Banner University Medical Center | Phoenix, Arizona, USA                    | Non-author collaborator                                 |                                                                                            |
| Beth Salvagio                     | Campbell   |                       |                  | Banner University Medical Center | Phoenix, Arizona, USA                    | Non-author collaborator                                 |                                                                                            |
| Cathleen                          | Wilson     |                       |                  | Banner University Medical Center | Phoenix, Arizona, USA                    | Non-author collaborator                                 |                                                                                            |
| Patrick                           | Rivers     |                       |                  | Banner University Medical Center | Phoenix, Arizona, USA                    | Non-author collaborator                                 |                                                                                            |
| Jonathan                          | Brinks     |                       |                  | Banner University Medical Center | Phoenix, Arizona, USA                    | Non-author collaborator                                 |                                                                                            |
| Mokenge Ndiva                     | Mongoh     |                       |                  | Banner University Medical Center | Phoenix, Arizona, USA                    | Non-author collaborator                                 |                                                                                            |
| Boris                             | Gilson     |                       |                  | Banner University Medical Center | Phoenix, Arizona, USA                    | Non-author collaborator                                 |                                                                                            |
| Valerie C                         | Danesh     |                       |                  | Baylor Scott & White Health      | Temple, Texas, USA                       | Non-author collaborator                                 |                                                                                            |
| Gueorgui                          | Dubrocq    |                       |                  | Baylor Scott & White Health      | Temple, Texas, USA                       | Non-author collaborator                                 |                                                                                            |
| Amber L                           | Davis      |                       |                  | Baylor Scott & White Health      | Temple, Texas, USA                       | Non-author collaborator                                 |                                                                                            |
| Marissa J                         | Hammers    |                       |                  | Baylor Scott & White Health      | Temple, Texas, USA                       | Non-author collaborator                                 |                                                                                            |
| Ill M                             | McGahey    |                       |                  | Baylor Scott & White Health      | Temple, Texas, USA                       | Non-author collaborator                                 |                                                                                            |
| Amanda C                          | Farris     |                       |                  | Baylor Scott & White Health      | Temple, Texas, USA                       | Non-author collaborator                                 |                                                                                            |
| Elisa                             | Priest     |                       |                  | Baylor Scott & White Health      | Temple, Texas, USA                       | Non-author collaborator                                 |                                                                                            |
| Robyn                             | Korsmo     |                       |                  | Baylor Scott & White Health      | Temple, Texas, USA                       | Non-author collaborator                                 |                                                                                            |
| Lorie                             | Fares      |                       |                  | Baylor Scott & White Health      | Temple, Texas, USA                       | Non-author collaborator                                 |                                                                                            |
| Kathy                             | Skiles     |                       |                  | Baylor Scott & White Health      | Temple, Texas, USA                       | Non-author collaborator                                 |                                                                                            |
| Susan M                           | Shor       |                       |                  | Baylor Scott & White Health      | Temple, Texas, USA                       | Non-author collaborator                                 |                                                                                            |
| Kenya                             | Burns      |                       |                  | Baylor Scott & White Health      | Temple, Texas, USA                       | Non-author collaborator                                 |                                                                                            |
| Corrie A                          | Dowell     |                       |                  | Baylor Scott & White Health      | Temple, Texas, USA                       | Non-author collaborator                                 |                                                                                            |
| Gabriela "Hope"                   | Gonzales   |                       |                  | Baylor Scott & White Health      | Temple, Texas, USA                       | Non-author collaborator                                 |                                                                                            |
| Melody                            | Flores     |                       |                  | Baylor Scott & White Health      | Temple, Texas, USA                       | Non-author collaborator                                 |                                                                                            |

## Supplemental Online Content: Nonauthor Collaborators

\*Indicates required information. Only first name, last name, and suffix will appear in PubMed.

| *First Name and Middle Initial(s) | *Last Name  | *Suffix (eg, Jr, III) | Academic Degrees | Institution                                                                  | Location (city, state/province, country) | Role or Contribution, eg, chair, principal investigator | Group (if more than 1 Group listed in the byline) and/or Subgroup (eg, Steering Committee) |
|-----------------------------------|-------------|-----------------------|------------------|------------------------------------------------------------------------------|------------------------------------------|---------------------------------------------------------|--------------------------------------------------------------------------------------------|
| Lindsay                           | Newman      |                       |                  | Baylor Scott & White Health                                                  | Temple, Texas, USA                       | Non-author collaborator                                 |                                                                                            |
| Debora A                          | Wilk        |                       |                  | Baylor Scott & White Health                                                  | Temple, Texas, USA                       | Non-author collaborator                                 |                                                                                            |
| Jason                             | Ettlinger   |                       |                  | Baylor Scott & White Health                                                  | Temple, Texas, USA                       | Non-author collaborator                                 |                                                                                            |
| Jaccallene                        | Bomar       |                       |                  | Baylor Scott & White Health                                                  | Temple, Texas, USA                       | Non-author collaborator                                 |                                                                                            |
| Himani                            | Darji       |                       |                  | Baylor Scott & White Health                                                  | Temple, Texas, USA                       | Non-author collaborator                                 |                                                                                            |
| Alejandro C                       | Arroliga    |                       |                  | Baylor Scott & White Health                                                  | Temple, Texas, USA                       | Non-author collaborator                                 |                                                                                            |
| Corrie A                          | Dowell      |                       |                  | Baylor Scott & White Health                                                  | Temple, Texas, USA                       | Non-author collaborator                                 |                                                                                            |
| Melody                            | Flores      |                       |                  | Baylor Scott & White Health                                                  | Temple, Texas, USA                       | Non-author collaborator                                 |                                                                                            |
| Lindsay                           | Newman      |                       |                  | Baylor Scott & White Health                                                  | Temple, Texas, USA                       | Non-author collaborator                                 |                                                                                            |
| Debora A                          | Wilk        |                       |                  | Baylor Scott & White Health                                                  | Temple, Texas, USA                       | Non-author collaborator                                 |                                                                                            |
| Jason                             | Ettlinger   |                       |                  | Baylor Scott & White Health                                                  | Temple, Texas, USA                       | Non-author collaborator                                 |                                                                                            |
| Himani                            | Darji       |                       |                  | Baylor Scott & White Health                                                  | Temple, Texas, USA                       | Non-author collaborator                                 |                                                                                            |
| Jaccallene                        | Bomar       |                       |                  | Baylor Scott & White Health                                                  | Temple, Texas, USA                       | Non-author collaborator                                 |                                                                                            |
| Paras B.                          | Khandhar    |                       |                  | Beaumont Children's Hospital                                                 | Royal Oak, Michigan, USA                 | Non-author collaborator                                 |                                                                                            |
| Elizabeth                         | Kring       |                       |                  | Beaumont Children's Hospital                                                 | Royal Oak, Michigan, USA                 | Non-author collaborator                                 |                                                                                            |
| Aaron S.                          | Miller      |                       |                  | Cardinal Glennon Children's Hospital                                         | St. Louis, Missouri, USA                 | Non-author collaborator                                 |                                                                                            |
| Edwin L.                          | Anderson    |                       |                  | Cardinal Glennon Children's Hospital                                         | St. Louis, Missouri, USA                 | Non-author collaborator                                 |                                                                                            |
| Rosemary                          | Nagy        |                       |                  | Cardinal Glennon Children's Hospital                                         | St. Louis, Missouri, USA                 | Non-author collaborator                                 |                                                                                            |
| Ravali R.                         | Inja        |                       |                  | Cardinal Glennon Children's Hospital                                         | St. Louis, Missouri, USA                 | Non-author collaborator                                 |                                                                                            |
| Pooja A.                          | Nawathe     |                       |                  | Cedars Sinai Medical Center                                                  | Los Angeles, California, USA             | Non-author collaborator                                 |                                                                                            |
| Isabel                            | Pedraza     |                       |                  | Cedars Sinai Medical Center                                                  | Los Angeles, California, USA             | Non-author collaborator                                 |                                                                                            |
| Jennifer                          | Tsing       |                       |                  | Cedars Sinai Medical Center                                                  | Los Angeles, California, USA             | Non-author collaborator                                 |                                                                                            |
| Karen                             | Carr        |                       |                  | Cedars Sinai Medical Center                                                  | Los Angeles, California, USA             | Non-author collaborator                                 |                                                                                            |
| Anila                             | Chaudhary   |                       |                  | Cedars Sinai Medical Center                                                  | Los Angeles, California, USA             | Non-author collaborator                                 |                                                                                            |
| Kathleen                          | Guglielmino |                       |                  | Cedars Sinai Medical Center                                                  | Los Angeles, California, USA             | Non-author collaborator                                 |                                                                                            |
| Imran A.                          | Sayed       |                       |                  | Children's Hospital Colorado, University of Colorado Anschutz Medical Campus | Aurora, Colorado, USA                    | Non-author collaborator                                 |                                                                                            |
| Katja M.                          | Gist        |                       |                  | Children's Hospital Colorado, University of Colorado Anschutz Medical Campus | Aurora, Colorado, USA                    | Non-author collaborator                                 |                                                                                            |

## Supplemental Online Content: Nonauthor Collaborators

\*Indicates required information. Only first name, last name, and suffix will appear in PubMed.

| *First Name and Middle Initial(s) | *Last Name | *Suffix (eg, Jr, III) | Academic Degrees | Institution                                                                  | Location (city, state/province, country) | Role or Contribution, eg, chair, principal investigator | Group (if more than 1 Group listed in the byline) and/or Subgroup (eg, Steering Committee) |
|-----------------------------------|------------|-----------------------|------------------|------------------------------------------------------------------------------|------------------------------------------|---------------------------------------------------------|--------------------------------------------------------------------------------------------|
| Larisa                            | Strom      |                       |                  | Children's Hospital Colorado, University of Colorado Anschutz Medical Campus | Aurora, Colorado, USA                    | Non-author collaborator                                 |                                                                                            |
| Kathleen                          | Chiotos    |                       |                  | Children's Hospital of Philadelphia                                          | Philadelphia, Pennsylvania, USA          | Non-author collaborator                                 |                                                                                            |
| Allison M.                        | Blatz      |                       |                  | Children's Hospital of Philadelphia                                          | Philadelphia, Pennsylvania, USA          | Non-author collaborator                                 |                                                                                            |
| Giyoung                           | Lee        |                       |                  | Children's Hospital of Philadelphia                                          | Philadelphia, Pennsylvania, USA          | Non-author collaborator                                 |                                                                                            |
| Ryan H.                           | Burnett    |                       |                  | Children's Hospital of Philadelphia                                          | Philadelphia, Pennsylvania, USA          | Non-author collaborator                                 |                                                                                            |
| Guy I.                            | Sydney     |                       |                  | Children's Hospital of Philadelphia                                          | Philadelphia, Pennsylvania, USA          | Non-author collaborator                                 |                                                                                            |
| Danielle M.                       | Traynor    |                       |                  | Children's Hospital of Philadelphia                                          | Philadelphia, Pennsylvania, USA          | Non-author collaborator                                 |                                                                                            |
| Sreekanth                         | Cheruku    |                       |                  | Clements University Hospital at UT Southwestern Medical Center               | Dallas, Texas, USA                       | Non-author collaborator                                 |                                                                                            |
| Farzin                            | Ahmed      |                       |                  | Clements University Hospital at UT Southwestern Medical Center               | Dallas, Texas, USA                       | Non-author collaborator                                 |                                                                                            |
| Christopher                       | Deonarine  |                       |                  | Clements University Hospital at UT Southwestern Medical Center               | Dallas, Texas, USA                       | Non-author collaborator                                 |                                                                                            |
| Ashley                            | Jones      |                       |                  | Clements University Hospital at UT Southwestern Medical Center               | Dallas, Texas, USA                       | Non-author collaborator                                 |                                                                                            |
| Mohammad-Ali                      | Shaikh     |                       |                  | Clements University Hospital at UT Southwestern Medical Center               | Dallas, Texas, USA                       | Non-author collaborator                                 |                                                                                            |
| David                             | Preston    |                       |                  | Clements University Hospital at UT Southwestern Medical Center               | Dallas, Texas, USA                       | Non-author collaborator                                 |                                                                                            |
| Jeanette                          | Chin       |                       |                  | Clements University Hospital at UT Southwestern Medical Center               | Dallas, Texas, USA                       | Non-author collaborator                                 |                                                                                            |
| Patrick S.                        | Milligan   |                       |                  | Community Health Network Indianapolis                                        | Indianapolis, Indiana, USA               | Non-author collaborator                                 |                                                                                            |
| Sandeep K.                        | Gupta      |                       |                  | Community Health Network Indianapolis                                        | Indianapolis, Indiana, USA               | Non-author collaborator                                 |                                                                                            |
| Joy M.                            | Koglin     |                       |                  | Community Health Network Indianapolis                                        | Indianapolis, Indiana, USA               | Non-author collaborator                                 |                                                                                            |
| Regina                            | Gibson     |                       |                  | Community Health Network Indianapolis                                        | Indianapolis, Indiana, USA               | Non-author collaborator                                 |                                                                                            |

Supplemental Online Content: Nonauthor Collaborators

\*Indicates required information. Only first name, last name, and suffix will appear in PubMed.

| *First Name and Middle Initial(s) | *Last Name | *Suffix (eg, Jr, III) | Academic Degrees | Institution                                      | Location (city, state/province, country) | Role or Contribution, eg, chair, principal investigator | Group (if more than 1 Group listed in the byline) and/or Subgroup (eg, Steering Committee) |
|-----------------------------------|------------|-----------------------|------------------|--------------------------------------------------|------------------------------------------|---------------------------------------------------------|--------------------------------------------------------------------------------------------|
| Lana                              | Johnson    |                       |                  | Community Health Network Indianapolis            | Indianapolis, Indiana, USA               | Non-author collaborator                                 |                                                                                            |
| Felicia                           | Preston    |                       |                  | Community Health Network Indianapolis            | Indianapolis, Indiana, USA               | Non-author collaborator                                 |                                                                                            |
| Crimson                           | Scott      |                       |                  | Community Health Network Indianapolis            | Indianapolis, Indiana, USA               | Non-author collaborator                                 |                                                                                            |
| Bethany                           | Nungester  |                       |                  | Community Health Network Indianapolis            | Indianapolis, Indiana, USA               | Non-author collaborator                                 |                                                                                            |
| Sarah                             | Menter     |                       |                  | Crouse Hospital, SUNY Upstate Medical University | Syracuse, New York, USA                  | Non-author collaborator                                 |                                                                                            |
| Alex                              | Wasilewski |                       |                  | Crouse Hospital, SUNY Upstate Medical University | Syracuse, New York, USA                  | Non-author collaborator                                 |                                                                                            |
| Viren                             | Kaul       |                       |                  | Crouse Hospital, SUNY Upstate Medical University | Syracuse, New York, USA                  | Non-author collaborator                                 |                                                                                            |
| Praise                            | Austin     |                       |                  | Crouse Hospital, SUNY Upstate Medical University | Syracuse, New York, USA                  | Non-author collaborator                                 |                                                                                            |
| Jaimie                            | Rogner     |                       |                  | Crouse Hospital, SUNY Upstate Medical University | Syracuse, New York, USA                  | Non-author collaborator                                 |                                                                                            |
| Anthony                           | Russo      |                       |                  | Crouse Hospital, SUNY Upstate Medical University | Syracuse, New York, USA                  | Non-author collaborator                                 |                                                                                            |
| Sidney                            | Ontai      |                       |                  | Detar Family Medicine residency                  | Victoria, Texas, USA                     | Non-author collaborator                                 |                                                                                            |
| Brian                             | Contreras  |                       | MD               | Detar Family Medicine residency                  | Victoria, Texas, USA                     | Non-author collaborator                                 |                                                                                            |
| Uzoma                             | Obinwanko  |                       |                  | Detar Family Medicine residency                  | Victoria, Texas, USA                     | Non-author collaborator                                 |                                                                                            |
| Nneka                             | Amamasi    |                       |                  | Detar Family Medicine residency                  | Victoria, Texas, USA                     | Non-author collaborator                                 |                                                                                            |
| Amir                              | Sharafi    |                       |                  | Detar Family Medicine residency                  | Victoria, Texas, USA                     | Non-author collaborator                                 |                                                                                            |
| Margit                            | Kaufman    |                       |                  | Englewood Health                                 | Englewood, New Jersey, USA               | Non-author collaborator                                 |                                                                                            |
| Gregg                             | Lobel      |                       |                  | Englewood Health                                 | Englewood, New Jersey, USA               | Non-author collaborator                                 |                                                                                            |
| Nisha                             | Gandhi     |                       |                  | Englewood Health                                 | Englewood, New Jersey, USA               | Non-author collaborator                                 |                                                                                            |
| Amr                               | Abdelaty   |                       |                  | Englewood Health                                 | Englewood, New Jersey, USA               | Non-author collaborator                                 |                                                                                            |
| Elizabeth                         | Shaji      |                       |                  | Englewood Health                                 | Englewood, New Jersey, USA               | Non-author collaborator                                 |                                                                                            |
| Kiana                             | Lim        |                       |                  | Englewood Health                                 | Englewood, New Jersey, USA               | Non-author collaborator                                 |                                                                                            |

## Supplemental Online Content: Nonauthor Collaborators

\*Indicates required information. Only first name, last name, and suffix will appear in PubMed.

| *First Name and Middle Initial(s) | *Last Name  | *Suffix (eg, Jr, III) | Academic Degrees | Institution                                   | Location (city, state/province, country) | Role or Contribution, eg, chair, principal investigator | Group (if more than 1 Group listed in the byline) and/or Subgroup (eg, Steering Committee) |
|-----------------------------------|-------------|-----------------------|------------------|-----------------------------------------------|------------------------------------------|---------------------------------------------------------|--------------------------------------------------------------------------------------------|
| Juan                              | Marte       |                       |                  | Englewood Health                              | Englewood, New Jersey, USA               | Non-author collaborator                                 |                                                                                            |
| Dani Ashley                       | Sosa        |                       |                  | Englewood Health                              | Englewood, New Jersey, USA               | Non-author collaborator                                 |                                                                                            |
| Nicholas                          | Perkins     |                       |                  | Greenville Memorial Hospital                  | Greenville, South Carolina, USA          | Non-author collaborator                                 |                                                                                            |
| Prerana                           | Roth        |                       |                  | Greenville Memorial Hospital                  | Greenville, South Carolina, USA          | Non-author collaborator                                 |                                                                                            |
| Alain                             | Litwin      |                       |                  | Greenville Memorial Hospital                  | Greenville, South Carolina, USA          | Non-author collaborator                                 |                                                                                            |
| Anand                             | Pariyadath  |                       |                  | Greenville Memorial Hospital                  | Greenville, South Carolina, USA          | Non-author collaborator                                 |                                                                                            |
| Phillip                           | Moschella   |                       |                  | Greenville Memorial Hospital                  | Greenville, South Carolina, USA          | Non-author collaborator                                 |                                                                                            |
| Trayson                           | Llano       |                       |                  | Greenville Memorial Hospital                  | Greenville, South Carolina, USA          | Non-author collaborator                                 |                                                                                            |
| Lior                              | Rennert     |                       |                  | Greenville Memorial Hospital                  | Greenville, South Carolina, USA          | Non-author collaborator                                 |                                                                                            |
| Heda R.                           | Dapul       |                       |                  | Hassenfeld Children's Hospital at NYU Langone | New York, New York, USA                  | Non-author collaborator                                 |                                                                                            |
| Alan                              | Salas       |                       |                  | Hassenfeld Children's Hospital at NYU Langone | New York, New York, USA                  | Non-author collaborator                                 |                                                                                            |
| Ariel                             | Daube       |                       |                  | Hassenfeld Children's Hospital at NYU Langone | New York, New York, USA                  | Non-author collaborator                                 |                                                                                            |
| Michelle                          | Korn        |                       |                  | Hassenfeld Children's Hospital at NYU Langone | New York, New York, USA                  | Non-author collaborator                                 |                                                                                            |
| Michelle                          | Ramirez     |                       |                  | Hassenfeld Children's Hospital at NYU Langone | New York, New York, USA                  | Non-author collaborator                                 |                                                                                            |
| Logi                              | Rajagopalan |                       |                  | Hassenfeld Children's Hospital at NYU Langone | New York, New York, USA                  | Non-author collaborator                                 |                                                                                            |
| Laura                             | Santos      |                       |                  | Hassenfeld Children's Hospital at NYU Langone | New York, New York, USA                  | Non-author collaborator                                 |                                                                                            |
| Sourabh                           | Verma       |                       |                  | Hassenfeld Children's Hospital at NYU Langone | New York, New York, USA                  | Non-author collaborator                                 |                                                                                            |
| Christine                         | Crandall    |                       |                  | John R. Oishei Children's Hospital            | Buffalo, New York, USA                   | Non-author collaborator                                 |                                                                                            |
| Sasko                             | Stojanovski |                       |                  | John R. Oishei Children's Hospital            | Buffalo, New York, USA                   | Non-author collaborator                                 |                                                                                            |
| Kristin                           | Johnson     |                       |                  | John R. Oishei Children's Hospital            | Buffalo, New York, USA                   | Non-author collaborator                                 |                                                                                            |

## Supplemental Online Content: Nonauthor Collaborators

\*Indicates required information. Only first name, last name, and suffix will appear in PubMed.

| *First Name and Middle Initial(s) | *Last Name | *Suffix (eg, Jr, III) | Academic Degrees | Institution                                       | Location (city, state/province, country) | Role or Contribution, eg, chair, principal investigator | Group (if more than 1 Group listed in the byline) and/or Subgroup (eg, Steering Committee) |
|-----------------------------------|------------|-----------------------|------------------|---------------------------------------------------|------------------------------------------|---------------------------------------------------------|--------------------------------------------------------------------------------------------|
| Kelly                             | Michienzi  |                       |                  | John R. Oishei Children's Hospital                | Buffalo, New York, USA                   | Non-author collaborator                                 |                                                                                            |
| Marwa Ridha                       | Amer       |                       |                  | King Faisal Specialist Hospital & Research Centre | Riyadh, Saudi Arabia                     | Non-author collaborator                                 |                                                                                            |
| Mohammed Abdullah                 | Bawazeer   |                       |                  | King Faisal Specialist Hospital & Research Centre | Riyadh, Saudi Arabia                     | Non-author collaborator                                 |                                                                                            |
| Talal I.                          | Dahhan     |                       |                  | King Faisal Specialist Hospital & Research Centre | Riyadh, Saudi Arabia                     | Non-author collaborator                                 |                                                                                            |
| Eiad                              | Kseibi     |                       |                  | King Faisal Specialist Hospital & Research Centre | Riyadh, Saudi Arabia                     | Non-author collaborator                                 |                                                                                            |
| Abid Shahzad                      | Butt       |                       |                  | King Faisal Specialist Hospital & Research Centre | Riyadh, Saudi Arabia                     | Non-author collaborator                                 |                                                                                            |
| Syed Moazzum                      | Khurshid   |                       |                  | King Faisal Specialist Hospital & Research Centre | Riyadh, Saudi Arabia                     | Non-author collaborator                                 |                                                                                            |
| Muath                             | Rabee      |                       |                  | King Faisal Specialist Hospital & Research Centre | Riyadh, Saudi Arabia                     | Non-author collaborator                                 |                                                                                            |
| Mohammed                          | Abujazar   |                       |                  | King Faisal Specialist Hospital & Research Centre | Riyadh, Saudi Arabia                     | Non-author collaborator                                 |                                                                                            |
| Razan                             | Alghunaim  |                       |                  | King Faisal Specialist Hospital & Research Centre | Riyadh, Saudi Arabia                     | Non-author collaborator                                 |                                                                                            |
| Maal                              | Abualkhair |                       |                  | King Faisal Specialist Hospital & Research Centre | Riyadh, Saudi Arabia                     | Non-author collaborator                                 |                                                                                            |
| Abeer Turki                       | AlFirm     |                       |                  | King Faisal Specialist Hospital & Research Centre | Riyadh, Saudi Arabia                     | Non-author collaborator                                 |                                                                                            |
| Eiad                              | Kseibi     |                       |                  | King Faisal Specialist Hospital & Research Centre | Riyadh, Saudi Arabia                     | Non-author collaborator                                 |                                                                                            |
| Syed Moazzum                      | Khurshid   |                       |                  | King Faisal Specialist Hospital & Research Centre | Riyadh, Saudi Arabia                     | Non-author collaborator                                 |                                                                                            |
| Muath                             | Rabee      |                       |                  | King Faisal Specialist Hospital & Research Centre | Riyadh, Saudi Arabia                     | Non-author collaborator                                 |                                                                                            |
| Mohammed                          | Abujazar   |                       |                  | King Faisal Specialist Hospital & Research Centre | Riyadh, Saudi Arabia                     | Non-author collaborator                                 |                                                                                            |
| Razan                             | Alghunaim  |                       |                  | King Faisal Specialist Hospital & Research Centre | Riyadh, Saudi Arabia                     | Non-author collaborator                                 |                                                                                            |
| Manoj K                           | Gupta      |                       |                  | Lincoln Medical and Mental Health Center          | New York, New York, USA                  | Non-author collaborator                                 |                                                                                            |
| Franscene E.                      | Oulds      |                       |                  | Lincoln Medical and Mental Health Center          | New York, New York, USA                  | Non-author collaborator                                 |                                                                                            |



## Supplemental Online Content: Nonauthor Collaborators

\*Indicates required information. Only first name, last name, and suffix will appear in PubMed.

| *First Name and Middle Initial(s) | *Last Name | *Suffix (eg, Jr, III) | Academic Degrees | Institution                                 | Location (city, state/province, country) | Role or Contribution, eg, chair, principal investigator | Group (if more than 1 Group listed in the byline) and/or Subgroup (eg, Steering Committee) |
|-----------------------------------|------------|-----------------------|------------------|---------------------------------------------|------------------------------------------|---------------------------------------------------------|--------------------------------------------------------------------------------------------|
| Akshay                            | Nandavar   |                       |                  | Lincoln Medical and Mental Health Center    | New York, New York, USA                  | Non-author collaborator                                 |                                                                                            |
| Andy Y.                           | Wen        |                       |                  | Lucile Packard Children's Hospital Stanford | Palo Alto, California                    | Non-author collaborator                                 |                                                                                            |
| Allie                             | DaCar      |                       |                  | Lucile Packard Children's Hospital Stanford | Palo Alto, California                    | Non-author collaborator                                 |                                                                                            |
| Ronald A.                         | Reilkoff   |                       |                  | M Health-Fairview, University of Minnesota  | Minneapolis, Minnesota, USA              | Non-author collaborator                                 |                                                                                            |
| Julia A.                          | Heneghan   |                       |                  | M Health-Fairview, University of Minnesota  | Minneapolis, Minnesota, USA              | Non-author collaborator                                 |                                                                                            |
| Sarah                             | Eichen     |                       |                  | M Health-Fairview, University of Minnesota  | Minneapolis, Minnesota, USA              | Non-author collaborator                                 |                                                                                            |
| Lexie                             | Goertzen   |                       |                  | M Health-Fairview, University of Minnesota  | Minneapolis, Minnesota, USA              | Non-author collaborator                                 |                                                                                            |
| Scott                             | Rajala     |                       |                  | M Health-Fairview, University of Minnesota  | Minneapolis, Minnesota, USA              | Non-author collaborator                                 |                                                                                            |
| Ghislaine                         | Feussom    |                       |                  | M Health-Fairview, University of Minnesota  | Minneapolis, Minnesota, USA              | Non-author collaborator                                 |                                                                                            |
| Ben                               | Tang       |                       |                  | M Health-Fairview, University of Minnesota  | Minneapolis, Minnesota, USA              | Non-author collaborator                                 |                                                                                            |
| Rahul                             | Kashyap    |                       |                  | Mayo Clinic Rochester                       | Rochester, Minnesota, USA                | Non-author collaborator                                 |                                                                                            |
| Juan Pablo                        | Domecq     |                       |                  | Mayo Clinic Rochester                       | Rochester, Minnesota, USA                | Non-author collaborator                                 |                                                                                            |
| Ognjen                            | Gajic      |                       |                  | Mayo Clinic Rochester                       | Rochester, Minnesota, USA                | Non-author collaborator                                 |                                                                                            |
| Vikas                             | Bansal     |                       |                  | Mayo Clinic Rochester                       | Rochester, Minnesota, USA                | Non-author collaborator                                 |                                                                                            |
| Aysun                             | Tekin      |                       |                  | Mayo Clinic Rochester                       | Rochester, Minnesota, USA                | Non-author collaborator                                 |                                                                                            |
| Amos                              | Lal        |                       |                  | Mayo Clinic Rochester                       | Rochester, Minnesota, USA                | Non-author collaborator                                 |                                                                                            |
| John C.                           | O'Horo     |                       |                  | Mayo Clinic Rochester                       | Rochester, Minnesota, USA                | Non-author collaborator                                 |                                                                                            |
| Neha N.                           | Deo        |                       |                  | Mayo Clinic Rochester                       | Rochester, Minnesota, USA                | Non-author collaborator                                 |                                                                                            |
| Mayank                            | Sharma     |                       |                  | Mayo Clinic Rochester                       | Rochester, Minnesota, USA                | Non-author collaborator                                 |                                                                                            |

## Supplemental Online Content: Nonauthor Collaborators

\*Indicates required information. Only first name, last name, and suffix will appear in PubMed.

| *First Name and Middle Initial(s) | *Last Name | *Suffix (eg, Jr, III) | Academic Degrees | Institution                      | Location (city, state/province, country) | Role or Contribution, eg, chair, principal investigator | Group (if more than 1 Group listed in the byline) and/or Subgroup (eg, Steering Committee) |
|-----------------------------------|------------|-----------------------|------------------|----------------------------------|------------------------------------------|---------------------------------------------------------|--------------------------------------------------------------------------------------------|
| Shahraz                           | Qamar      |                       |                  | Mayo Clinic Rochester            | Rochester, Minnesota, USA                | Non-author collaborator                                 |                                                                                            |
| Romil                             | Singh      |                       |                  | Mayo Clinic Rochester            | Rochester, Minnesota, USA                | Non-author collaborator                                 |                                                                                            |
| Diana J. Valencia                 | Morales    |                       |                  | Mayo Clinic Rochester            | Rochester, Minnesota, USA                | Non-author collaborator                                 |                                                                                            |
| Syed Anjum                        | Khan       |                       |                  | Mayo Clinic, Mankato             | Mankato, Minnesota, USA                  | Non-author collaborator                                 |                                                                                            |
| Nitesh Kumar                      | Jain       |                       |                  | Mayo Clinic, Mankato             | Mankato, Minnesota, USA                  | Non-author collaborator                                 |                                                                                            |
| Thoyaja                           | Koritala   |                       |                  | Mayo Clinic, Mankato             | Mankato, Minnesota, USA                  | Non-author collaborator                                 |                                                                                            |
| Yasir                             | Tarabichi  |                       |                  | MetroHealth Medical Center       | Cleveland, Ohio, USA                     | Non-author collaborator                                 |                                                                                            |
| Adam                              | Perzynski  |                       |                  | MetroHealth Medical Center       | Cleveland, Ohio, USA                     | Non-author collaborator                                 |                                                                                            |
| Christine                         | Wang       |                       |                  | MetroHealth Medical Center       | Cleveland, Ohio, USA                     | Non-author collaborator                                 |                                                                                            |
| Dhatri                            | Kotekal    |                       |                  | MetroHealth Medical Center       | Cleveland, Ohio, USA                     | Non-author collaborator                                 |                                                                                            |
| Prithvi                           | Sendi      |                       |                  | Nicklaus Children's Hospital     | Miami, Florida, USA                      | Non-author collaborator                                 |                                                                                            |
| Balagangadhar                     | Totapally  |                       |                  | Nicklaus Children's Hospital     | Miami, Florida, USA                      | Non-author collaborator                                 |                                                                                            |
| Bhagat S.                         | Aulakh     |                       |                  | OSF Saint Francis Medical Center | Peoria, Illinois, USA                    | Non-author collaborator                                 |                                                                                            |
| Sandeep                           | Tripathi   |                       |                  | OSF Saint Francis Medical Center | Peoria, Illinois, USA                    | Non-author collaborator                                 |                                                                                            |
| Jennifer A.                       | Bandy      |                       |                  | OSF Saint Francis Medical Center | Peoria, Illinois, USA                    | Non-author collaborator                                 |                                                                                            |
| Lisa M.                           | Kreps      |                       |                  | OSF Saint Francis Medical Center | Peoria, Illinois, USA                    | Non-author collaborator                                 |                                                                                            |
| Dawn R.                           | Bollinger  |                       |                  | OSF Saint Francis Medical Center | Peoria, Illinois, USA                    | Non-author collaborator                                 |                                                                                            |
| Meghana                           | Nadiger    |                       |                  | OSF Saint Francis Medical Center | Peoria, Illinois, USA                    | Non-author collaborator                                 |                                                                                            |
| Victoria                          | Schauf     |                       |                  | Ridgecrest Regional Hospital     | Ridgecrest, California, USA              | Non-author collaborator                                 |                                                                                            |
| Chris                             | Wall       |                       |                  | Ridgecrest Regional Hospital     | Ridgecrest, California, USA              | Non-author collaborator                                 |                                                                                            |
| Shina                             | Menon      |                       |                  | Seattle Children's Hospital      | Seattle, Washington, USA                 | Non-author collaborator                                 |                                                                                            |
| John K                            | McGuire    |                       |                  | Seattle Children's Hospital      | Seattle, Washington, USA                 | Non-author collaborator                                 |                                                                                            |
| Deana                             | Rich       |                       |                  | Seattle Children's Hospital      | Seattle, Washington, USA                 | Non-author collaborator                                 |                                                                                            |
| Harry L.                          | Anderson   | III                   |                  | St. Joseph Mercy Ann Arbor       | Ann Arbor, Michigan, USA                 | Non-author collaborator                                 |                                                                                            |

Supplemental Online Content: Nonauthor Collaborators

\*Indicates required information. Only first name, last name, and suffix will appear in PubMed.

| *First Name and Middle Initial(s) | *Last Name  | *Suffix (eg, Jr, III) | Academic Degrees | Institution                        | Location (city, state/province, country) | Role or Contribution, eg, chair, principal investigator | Group (if more than 1 Group listed in the byline) and/or Subgroup (eg, Steering Committee) |
|-----------------------------------|-------------|-----------------------|------------------|------------------------------------|------------------------------------------|---------------------------------------------------------|--------------------------------------------------------------------------------------------|
| Dixy                              | Rajkumar    |                       |                  | St. Joseph Mercy Ann Arbor         | Ann Arbor, Michigan, USA                 | Non-author collaborator                                 |                                                                                            |
| Ali                               | Abunayla    |                       |                  | St. Joseph Mercy Ann Arbor         | Ann Arbor, Michigan, USA                 | Non-author collaborator                                 |                                                                                            |
| Jerrilyn                          | Heiter      |                       |                  | St. Joseph Mercy Ann Arbor         | Ann Arbor, Michigan, USA                 | Non-author collaborator                                 |                                                                                            |
| Howard A.                         | Zaren       |                       |                  | St. Joseph's Candler Health System | Savannah, Georgia, USA                   | Non-author collaborator                                 |                                                                                            |
| Stephanie J.                      | Smith       |                       |                  | St. Joseph's Candler Health System | Savannah, Georgia, USA                   | Non-author collaborator                                 |                                                                                            |
| Grant C.                          | Lewis       |                       |                  | St. Joseph's Candler Health System | Savannah, Georgia, USA                   | Non-author collaborator                                 |                                                                                            |
| Lauren                            | Seames      |                       |                  | St. Joseph's Candler Health System | Savannah, Georgia, USA                   | Non-author collaborator                                 |                                                                                            |
| Cheryl                            | Farlow      |                       |                  | St. Joseph's Candler Health System | Savannah, Georgia, USA                   | Non-author collaborator                                 |                                                                                            |
| Judy                              | Miller      |                       |                  | St. Joseph's Candler Health System | Savannah, Georgia, USA                   | Non-author collaborator                                 |                                                                                            |
| Gloria                            | Broadstreet |                       |                  | St. Joseph's Candler Health System | Savannah, Georgia, USA                   | Non-author collaborator                                 |                                                                                            |
| John                              | Lin         |                       |                  | St. Louis Children's Hospital      | St. Louis, Missouri, USA                 | Non-author collaborator                                 |                                                                                            |
| Cindy                             | Terrill     |                       |                  | St. Louis Children's Hospital      | St. Louis, Missouri, USA                 | Non-author collaborator                                 |                                                                                            |
| Brock                             | Montgomery  |                       |                  | St. Louis Children's Hospital      | St. Louis, Missouri, USA                 | Non-author collaborator                                 |                                                                                            |
| Sydney                            | Reyes       |                       |                  | St. Louis Children's Hospital      | St. Louis, Missouri, USA                 | Non-author collaborator                                 |                                                                                            |
| Summer                            | Reyes       |                       |                  | St. Louis Children's Hospital      | St. Louis, Missouri, USA                 | Non-author collaborator                                 |                                                                                            |
| Alex                              | Plattner    |                       |                  | St. Louis Children's Hospital      | St. Louis, Missouri, USA                 | Non-author collaborator                                 |                                                                                            |
| Anthony                           | Martinez    |                       |                  | St. Agnes Hospital                 | Baltimore, Maryland, USA                 | Non-author collaborator                                 |                                                                                            |
| Micheal                           | Allison     |                       |                  | St. Agnes Hospital                 | Baltimore, Maryland, USA                 | Non-author collaborator                                 |                                                                                            |
| Aniket                            | Mittal      |                       |                  | St. Agnes Hospital                 | Baltimore, Maryland, USA                 | Non-author collaborator                                 |                                                                                            |
| Rafael                            | Ruiz        |                       |                  | St. Agnes Hospital                 | Baltimore, Maryland, USA                 | Non-author collaborator                                 |                                                                                            |
| Aleta                             | Skaanland   |                       |                  | St. Agnes Hospital                 | Baltimore, Maryland, USA                 | Non-author collaborator                                 |                                                                                            |

## Supplemental Online Content: Nonauthor Collaborators

\*Indicates required information. Only first name, last name, and suffix will appear in PubMed.

| *First Name and Middle Initial(s) | *Last Name | *Suffix (eg, Jr, III) | Academic Degrees | Institution                            | Location (city, state/province, country) | Role or Contribution, eg, chair, principal investigator | Group (if more than 1 Group listed in the byline) and/or Subgroup (eg, Steering Committee) |
|-----------------------------------|------------|-----------------------|------------------|----------------------------------------|------------------------------------------|---------------------------------------------------------|--------------------------------------------------------------------------------------------|
| Robert                            | Ross       |                       |                  | St.Agnes Hospital                      | Baltimore, Maryland, USA                 | Non-author collaborator                                 |                                                                                            |
| Ioana                             | Amzuta     |                       |                  | SUNY Upstate Medical University        | Syracuse, New York, USA                  | Non-author collaborator                                 |                                                                                            |
| Amish                             | Shah       |                       |                  | SUNY Upstate Medical University        | Syracuse, New York, USA                  | Non-author collaborator                                 |                                                                                            |
| Ritu                              | Modi       |                       |                  | SUNY Upstate Medical University        | Syracuse, New York, USA                  | Non-author collaborator                                 |                                                                                            |
| Hassan                            | Al-Khalisy |                       |                  | SUNY Upstate Medical University        | Syracuse, New York, USA                  | Non-author collaborator                                 |                                                                                            |
| Pardeep                           | Masuta     |                       |                  | SUNY Upstate Medical University        | Syracuse, New York, USA                  | Non-author collaborator                                 |                                                                                            |
| Melissa                           | Schafer    |                       |                  | SUNY Upstate Medical University        | Syracuse, New York, USA                  | Non-author collaborator                                 |                                                                                            |
| Angela                            | Wratney    |                       |                  | SUNY Upstate Medical University        | Syracuse, New York, USA                  | Non-author collaborator                                 |                                                                                            |
| Neha                              | Gupta      |                       |                  | The Children's Hospital at OU Medicine | Oklahoma City, Oklahoma, USA             | Non-author collaborator                                 |                                                                                            |
| Tracy L                           | Jones      |                       |                  | The Children's Hospital at OU Medicine | Oklahoma City, Oklahoma, USA             | Non-author collaborator                                 |                                                                                            |
| Shonda C                          | Ayers      |                       |                  | The Children's Hospital at OU Medicine | Oklahoma City, Oklahoma, USA             | Non-author collaborator                                 |                                                                                            |
| Amy B                             | Harrell    |                       |                  | The Children's Hospital at OU Medicine | Oklahoma City, Oklahoma, USA             | Non-author collaborator                                 |                                                                                            |
| Brent R                           | Brown      |                       |                  | The Children's Hospital at OU Medicine | Oklahoma City, Oklahoma, USA             | Non-author collaborator                                 |                                                                                            |
| Neha                              | Gupta      |                       |                  | The Children's Hospital at OU Medicine | Oklahoma City, Oklahoma, USA             | Non-author collaborator                                 |                                                                                            |
| Brent                             | Brown      |                       |                  | The Children's Hospital at OU Medicine | Oklahoma City, Oklahoma, USA             | Non-author collaborator                                 |                                                                                            |
| Tracy L                           | Jones      |                       |                  | OU Medical Center                      | Oklahoma City, Oklahoma, USA             | Non-author collaborator                                 |                                                                                            |
| Kassidy                           | Malone     |                       |                  | OU Medical Center                      | Oklahoma City, Oklahoma, USA             | Non-author collaborator                                 |                                                                                            |
| Lauren A                          | Sinko      |                       |                  | OU Medical Center                      | Oklahoma City, Oklahoma, USA             | Non-author collaborator                                 |                                                                                            |

## Supplemental Online Content: Nonauthor Collaborators

\*Indicates required information. Only first name, last name, and suffix will appear in PubMed.

| *First Name and Middle Initial(s) | *Last Name | *Suffix (eg, Jr, III) | Academic Degrees | Institution                                                        | Location (city, state/province, country) | Role or Contribution, eg, chair, principal investigator | Group (if more than 1 Group listed in the byline) and/or Subgroup (eg, Steering Committee) |
|-----------------------------------|------------|-----------------------|------------------|--------------------------------------------------------------------|------------------------------------------|---------------------------------------------------------|--------------------------------------------------------------------------------------------|
| Amy B                             | Hrarrrell  |                       |                  | OU Medical Center                                                  | Oklahoma City, Oklahoma, USA             | Non-author collaborator                                 |                                                                                            |
| Shonda C                          | Ayers      |                       |                  | OU Medical Center                                                  | Oklahoma City, Oklahoma, USA             | Non-author collaborator                                 |                                                                                            |
| Lisa M.                           | Settle     |                       |                  | OU Medical Center                                                  | Oklahoma City, Oklahoma, USA             | Non-author collaborator                                 |                                                                                            |
| Taylor J                          | Sears      |                       |                  | OU Medical Center                                                  | Oklahoma City, Oklahoma, USA             | Non-author collaborator                                 |                                                                                            |
| Utpal S.                          | Bhalala    |                       |                  | The Children's Hospital of San Antonio, Baylor College of Medicine | San Antonio, Texas, USA                  | Non-author collaborator                                 |                                                                                            |
| Joshua                            | Kuehne     |                       |                  | The Children's Hospital of San Antonio, Baylor College of Medicine | San Antonio, Texas, USA                  | Non-author collaborator                                 |                                                                                            |
| Melinda                           | Garcia     |                       |                  | The Children's Hospital of San Antonio, Baylor College of Medicine | San Antonio, Texas, USA                  | Non-author collaborator                                 |                                                                                            |
| Morgan                            | Beebe      |                       |                  | The Children's Hospital of San Antonio, Baylor College of Medicine | San Antonio, Texas, USA                  | Non-author collaborator                                 |                                                                                            |
| Heather                           | Herrera    |                       |                  | The Children's Hospital of San Antonio, Baylor College of Medicine | San Antonio, Texas, USA                  | Non-author collaborator                                 |                                                                                            |
| Katherine A.                      | Belden     |                       |                  | Thomas Jefferson University Hospital                               | Philadelphia, Pennsylvania, USA          | Non-author collaborator                                 |                                                                                            |
| Michael                           | Baram      |                       |                  | Thomas Jefferson University Hospital                               | Philadelphia, Pennsylvania, USA          | Non-author collaborator                                 |                                                                                            |
| Devin M.                          | Weber      |                       |                  | Thomas Jefferson University Hospital                               | Philadelphia, Pennsylvania, USA          | Non-author collaborator                                 |                                                                                            |
| Rosalie                           | DePaola    |                       |                  | Thomas Jefferson University Hospital                               | Philadelphia, Pennsylvania, USA          | Non-author collaborator                                 |                                                                                            |
| Yuwei                             | Xia        |                       |                  | Thomas Jefferson University Hospital                               | Philadelphia, Pennsylvania, USA          | Non-author collaborator                                 |                                                                                            |
| Hudson                            | Carter     |                       |                  | Thomas Jefferson University Hospital                               | Philadelphia, Pennsylvania, USA          | Non-author collaborator                                 |                                                                                            |
| Aaron                             | Tolley     |                       |                  | Thomas Jefferson University Hospital                               | Philadelphia, Pennsylvania, USA          | Non-author collaborator                                 |                                                                                            |
| Mary                              | Ferranti   |                       |                  | Thomas Jefferson University Hospital                               | Philadelphia, Pennsylvania, USA          | Non-author collaborator                                 |                                                                                            |
| Erica C.                          | Bjornstad  |                       |                  | University of Alabama at Birmingham                                | Birmingham, Alabama, USA                 | Non-author collaborator                                 |                                                                                            |

## Supplemental Online Content: Nonauthor Collaborators

\*Indicates required information. Only first name, last name, and suffix will appear in PubMed.

| *First Name and Middle Initial(s) | *Last Name       | *Suffix (eg, Jr, III) | Academic Degrees | Institution                                   | Location (city, state/province, country) | Role or Contribution, eg, chair, principal investigator | Group (if more than 1 Group listed in the byline) and/or Subgroup (eg, Steering Committee) |
|-----------------------------------|------------------|-----------------------|------------------|-----------------------------------------------|------------------------------------------|---------------------------------------------------------|--------------------------------------------------------------------------------------------|
| Nancy M.                          | Tofil            |                       |                  | University of Alabama at Birmingham           | Birmingham, Alabama, USA                 | Non-author collaborator                                 |                                                                                            |
| Scott                             | House            |                       |                  | University of Alabama at Birmingham           | Birmingham, Alabama, USA                 | Non-author collaborator                                 |                                                                                            |
| Isabella                          | Aldana           |                       |                  | University of Alabama at Birmingham           | Birmingham, Alabama, USA                 | Non-author collaborator                                 |                                                                                            |
| Casey W                           | Stulce           |                       |                  | University of Chicago                         | Chicago, Illinois, USA                   | Non-author collaborator                                 |                                                                                            |
| Grace                             | Chong            |                       |                  | University of Chicago                         | Chicago, Illinois, USA                   | Non-author collaborator                                 |                                                                                            |
| Ahmeneh                           | Ghavam           |                       |                  | University of Chicago                         | Chicago, Illinois, USA                   | Non-author collaborator                                 |                                                                                            |
| Anoop                             | Mayampurath      |                       |                  | University of Chicago                         | Chicago, Illinois, USA                   | Non-author collaborator                                 |                                                                                            |
| Azra                              | Bihorac          |                       |                  | University of Florida Health Shands Hospital  | Gainesville, Florida, USA                | Non-author collaborator                                 |                                                                                            |
| Tezcan Ozrazgat                   | Baslanti         |                       |                  | University of Florida Health Shands Hospital  | Gainesville, Florida, USA                | Non-author collaborator                                 |                                                                                            |
| George                            | Omalay           |                       |                  | University of Florida Health Shands Hospital  | Gainesville, Florida, USA                | Non-author collaborator                                 |                                                                                            |
| Haleh                             | Hashemighouchani |                       |                  | University of Florida Health Shands Hospital  | Gainesville, Florida, USA                | Non-author collaborator                                 |                                                                                            |
| Julie S                           | Cupka            |                       |                  | University of Florida Health Shands Hospital  | Gainesville, Florida, USA                | Non-author collaborator                                 |                                                                                            |
| Matthew M                         | Ruppert          |                       |                  | University of Florida Health Shands Hospital  | Gainesville, Florida, USA                | Non-author collaborator                                 |                                                                                            |
| Patrick W.                        | McGonagill       |                       |                  | University of Iowa Carver College of Medicine | Iowa City, Iowa, USA                     | Non-author collaborator                                 |                                                                                            |
| Colette                           | Galet            |                       |                  | University of Iowa Carver College of Medicine | Iowa City, Iowa, USA                     | Non-author collaborator                                 |                                                                                            |
| Janice                            | Hubbard          |                       |                  | University of Iowa Carver College of Medicine | Iowa City, Iowa, USA                     | Non-author collaborator                                 |                                                                                            |
| David                             | Wang             |                       |                  | University of Iowa Carver College of Medicine | Iowa City, Iowa, USA                     | Non-author collaborator                                 |                                                                                            |
| Lauren                            | Allan            |                       |                  | University of Iowa Carver College of Medicine | Iowa City, Iowa, USA                     | Non-author collaborator                                 |                                                                                            |
| Aditya                            | Badheka          |                       |                  | University of Iowa Carver College of Medicine | Iowa City, Iowa, USA                     | Non-author collaborator                                 |                                                                                            |
| Madhuradhar                       | Chegoni          |                       |                  | University of Iowa Carver College of Medicine | Iowa City, Iowa, USA                     | Non-author collaborator                                 |                                                                                            |

## Supplemental Online Content: Nonauthor Collaborators

\*Indicates required information. Only first name, last name, and suffix will appear in PubMed.

| *First Name and Middle Initial(s) | *Last Name | *Suffix (eg, Jr, III) | Academic Degrees | Institution                                             | Location (city, state/province, country) | Role or Contribution, eg, chair, principal investigator | Group (if more than 1 Group listed in the byline) and/or Subgroup (eg, Steering Committee) |
|-----------------------------------|------------|-----------------------|------------------|---------------------------------------------------------|------------------------------------------|---------------------------------------------------------|--------------------------------------------------------------------------------------------|
| Usman                             | Nazir      |                       |                  | University of Kansas Medical Center                     | Kansas City, Kansas, USA                 | Non-author collaborator                                 |                                                                                            |
| Garrett                           | Rampon     |                       |                  | University of Kansas Medical Center                     | Kansas City, Kansas, USA                 | Non-author collaborator                                 |                                                                                            |
| Jake                              | Riggle     |                       |                  | University of Kansas Medical Center                     | Kansas City, Kansas, USA                 | Non-author collaborator                                 |                                                                                            |
| Nathan                            | Dismang    |                       |                  | University of Kansas Medical Center                     | Kansas City, Kansas, USA                 | Non-author collaborator                                 |                                                                                            |
| Vicki                             | Montgomery |                       |                  | University of Louisville and Norton Children's Hospital | Louisville, Kentucky, USA                | Non-author collaborator                                 |                                                                                            |
| Janice                            | Sullivan   |                       |                  | University of Louisville and Norton Children's Hospital | Louisville, Kentucky, USA                | Non-author collaborator                                 |                                                                                            |
| Sarah                             | Morris     |                       |                  | University of Louisville and Norton Children's Hospital | Louisville, Kentucky, USA                | Non-author collaborator                                 |                                                                                            |
| Jennifer                          | Nason      |                       |                  | University of Louisville and Norton Children's Hospital | Louisville, Kentucky, USA                | Non-author collaborator                                 |                                                                                            |
| Murtaza                           | Akhter     |                       |                  | Valleywise Health (formerly Maricopa Medical Center)    | Phoenix, Arizona, USA                    | Non-author collaborator                                 |                                                                                            |
| Rania Abdul                       | Rahman     |                       |                  | Valleywise Health (formerly Maricopa Medical Center)    | Phoenix, Arizona, USA                    | Non-author collaborator                                 |                                                                                            |
| Mary                              | Mulrow     |                       |                  | Valleywise Health (formerly Maricopa Medical Center)    | Phoenix, Arizona, USA                    | Non-author collaborator                                 |                                                                                            |
| Markos G.                         | Kashiouris |                       |                  | Virginia Commonwealth University Medical Center         | Richmond, Virginia, USA                  | Non-author collaborator                                 |                                                                                            |
| Tamas                             | Gal        |                       |                  | Virginia Commonwealth University Medical Center         | Richmond, Virginia, USA                  | Non-author collaborator                                 |                                                                                            |
| Manasi                            | Mahashabde |                       |                  | Virginia Commonwealth University Medical Center         | Richmond, Virginia, USA                  | Non-author collaborator                                 |                                                                                            |
| Alexandra                         | Vagonis    |                       |                  | Virginia Commonwealth University Medical Center         | Richmond, Virginia, USA                  | Non-author collaborator                                 |                                                                                            |
| Rebecca                           | Uber       |                       |                  | Virginia Commonwealth University Medical Center         | Richmond, Virginia, USA                  | Non-author collaborator                                 |                                                                                            |
| Haseeb                            | Mahmud     |                       |                  | Virginia Commonwealth University Medical Center         | Richmond, Virginia, USA                  | Non-author collaborator                                 |                                                                                            |
| Stefan                            | Leightle   |                       |                  | Virginia Commonwealth University Medical Center         | Richmond, Virginia, USA                  | Non-author collaborator                                 |                                                                                            |

## Supplemental Online Content: Nonauthor Collaborators

\*Indicates required information. Only first name, last name, and suffix will appear in PubMed.

| *First Name and Middle Initial(s) | *Last Name  | *Suffix (eg, Jr, III) | Academic Degrees | Institution                                                                   | Location (city, state/province, country) | Role or Contribution, eg, chair, principal investigator | Group (if more than 1 Group listed in the byline) and/or Subgroup (eg, Steering Committee) |
|-----------------------------------|-------------|-----------------------|------------------|-------------------------------------------------------------------------------|------------------------------------------|---------------------------------------------------------|--------------------------------------------------------------------------------------------|
| Zoe                               | Zhang       |                       |                  | Virginia Commonwealth University Medical Center                               | Richmond, Virginia, USA                  | Non-author collaborator                                 |                                                                                            |
| Nicole                            | Vissichelli |                       |                  | Virginia Commonwealth University Medical Center                               | Richmond, Virginia, USA                  | Non-author collaborator                                 |                                                                                            |
| Oliver                            | Karam       |                       |                  | Virginia Commonwealth University Medical Center                               | Richmond, Virginia, USA                  | Non-author collaborator                                 |                                                                                            |
| Alia                              | O'Meara     |                       |                  | Virginia Commonwealth University Medical Center                               | Richmond, Virginia, USA                  | Non-author collaborator                                 |                                                                                            |
| Heloisa De                        | Carvalho    |                       |                  | Virginia Commonwealth University Medical Center                               | Richmond, Virginia, USA                  | Non-author collaborator                                 |                                                                                            |
| Katie                             | Rocawich    |                       |                  | Virginia Commonwealth University Medical Center                               | Richmond, Virginia, USA                  | Non-author collaborator                                 |                                                                                            |
| Ashish K.                         | Khanna      |                       |                  | Wake Forest University School of Medicine; Wake Forest Baptist Health Network | Winston-Salem, North Carolina, USA       | Non-author collaborator                                 |                                                                                            |
| Lynnette                          | Harris      |                       |                  | Wake Forest University School of Medicine; Wake Forest Baptist Health Network | Winston-Salem, North Carolina, USA       | Non-author collaborator                                 |                                                                                            |
| Bruce                             | Cusson      |                       |                  | Wake Forest University School of Medicine; Wake Forest Baptist Health Network | Winston-Salem, North Carolina, USA       | Non-author collaborator                                 |                                                                                            |
| Brandon                           | Reeves      |                       |                  | Wake Forest University School of Medicine; Wake Forest Baptist Health Network | Winston-Salem, North Carolina, USA       | Non-author collaborator                                 |                                                                                            |
| Jessica                           | Fanelli     |                       |                  | Wake Forest University School of Medicine; Wake Forest Baptist Health Network | Winston-Salem, North Carolina, USA       | Non-author collaborator                                 |                                                                                            |
| Nataya                            | Disher      |                       |                  | Wake Forest University School of Medicine; Wake Forest Baptist Health Network | Winston-Salem, North Carolina, USA       | Non-author collaborator                                 |                                                                                            |
| Anusha                            | Samant      |                       |                  | Wake Forest University School of Medicine; Wake Forest Baptist Health Network | Winston-Salem, North Carolina, USA       | Non-author collaborator                                 |                                                                                            |
| Chritian                          | DeGroot     |                       |                  | Wake Forest University School of Medicine; Wake Forest Baptist Health Network | Winston-Salem, North Carolina, USA       | Non-author collaborator                                 |                                                                                            |
| Evan                              | Youshock    |                       |                  | Wake Forest University School of Medicine; Wake Forest Baptist Health Network | Winston-Salem, North Carolina, USA       | Non-author collaborator                                 |                                                                                            |
| R. Miller                         | Ligon       |                       |                  | Wake Forest University School of Medicine; Wake Forest Baptist Health Network | Winston-Salem, North Carolina, USA       | Non-author collaborator                                 |                                                                                            |
| Katherine                         | McCartney   |                       |                  | Wake Forest University School of Medicine; Wake Forest Baptist Health Network | Winston-Salem, North Carolina, USA       | Non-author collaborator                                 |                                                                                            |
| Julio                             | Garcia      |                       |                  | Wake Forest University School of Medicine; Wake Forest Baptist Health Network | Winston-Salem, North Carolina, USA       | Non-author collaborator                                 |                                                                                            |



Supplemental Online Content: Nonauthor Collaborators

\*Indicates required information. Only first name, last name, and suffix will appear in PubMed.

| *First Name and Middle Initial(s) | *Last Name  | *Suffix (eg, Jr, III) | Academic Degrees | Institution                                                                   | Location (city, state/province, country) | Role or Contribution, eg, chair, principal investigator | Group (if more than 1 Group listed in the byline) and/or Subgroup (eg, Steering Committee) |
|-----------------------------------|-------------|-----------------------|------------------|-------------------------------------------------------------------------------|------------------------------------------|---------------------------------------------------------|--------------------------------------------------------------------------------------------|
| Chidi                             | Iloabachie  |                       |                  | Wake Forest University School of Medicine; Wake Forest Baptist Health Network | Winston-Salem, North Carolina, USA       | Non-author collaborator                                 |                                                                                            |
| Kelsey                            | Flores      |                       |                  | Wake Forest University School of Medicine; Wake Forest Baptist Health Network | Winston-Salem, North Carolina, USA       | Non-author collaborator                                 |                                                                                            |
| David                             | VanEenenaam |                       |                  | Wake Forest University School of Medicine; Wake Forest Baptist Health Network | Winston-Salem, North Carolina, USA       | Non-author collaborator                                 |                                                                                            |
| Lauren                            | Sands       |                       |                  | Wake Forest University School of Medicine; Wake Forest Baptist Health Network | Winston-Salem, North Carolina, USA       | Non-author collaborator                                 |                                                                                            |
| Samuel                            | Robinson    |                       |                  | Wake Forest University School of Medicine; Wake Forest Baptist Health Network | Winston-Salem, North Carolina, USA       | Non-author collaborator                                 |                                                                                            |
| Nia                               | Sweatt      |                       |                  | Wake Forest University School of Medicine; Wake Forest Baptist Health Network | Winston-Salem, North Carolina, USA       | Non-author collaborator                                 |                                                                                            |
| Jacob                             | Fowler      |                       |                  | Wake Forest University School of Medicine; Wake Forest Baptist Health Network | Winston-Salem, North Carolina, USA       | Non-author collaborator                                 |                                                                                            |
| Madeline                          | Fram        |                       |                  | Wake Forest University School of Medicine; Wake Forest Baptist Health Network | Winston-Salem, North Carolina, USA       | Non-author collaborator                                 |                                                                                            |
| Easton                            | Howard      |                       |                  | Wake Forest University School of Medicine; Wake Forest Baptist Health Network | Winston-Salem, North Carolina, USA       | Non-author collaborator                                 |                                                                                            |
| Kathleen                          | Johnson     |                       |                  | Wake Forest University School of Medicine; Wake Forest Baptist Health Network | Winston-Salem, North Carolina, USA       | Non-author collaborator                                 |                                                                                            |
| Imoh                              | Udoh        |                       |                  | Wake Forest University School of Medicine; Wake Forest Baptist Health Network | Winston-Salem, North Carolina, USA       | Non-author collaborator                                 |                                                                                            |
| Lillian                           | Nosow       |                       |                  | Wake Forest University School of Medicine; Wake Forest Baptist Health Network | Winston-Salem, North Carolina, USA       | Non-author collaborator                                 |                                                                                            |
| Lucy Winesett                     | Howard      |                       |                  | Wake Forest University School of Medicine; Wake Forest Baptist Health Network | Winston-Salem, North Carolina, USA       | Non-author collaborator                                 |                                                                                            |
| Quan Duc Minh                     | Pham        |                       |                  | Wake Forest University School of Medicine; Wake Forest Baptist Health Network | Winston-Salem, North Carolina, USA       | Non-author collaborator                                 |                                                                                            |
| Aman                              | Irfanullah  |                       |                  | Wake Forest University School of Medicine; Wake Forest Baptist Health Network | Winston-Salem, North Carolina, USA       | Non-author collaborator                                 |                                                                                            |
| Tiffany                           | Ong         |                       |                  | Wake Forest University School of Medicine; Wake Forest Baptist Health Network | Winston-Salem, North Carolina, USA       | Non-author collaborator                                 |                                                                                            |
| Chukwunyelu Henry                 | Enwezor     |                       |                  | Wake Forest University School of Medicine; Wake Forest Baptist Health Network | Winston-Salem, North Carolina, USA       | Non-author collaborator                                 |                                                                                            |
| Hannah                            | Dabagian    |                       |                  | Wake Forest University School of Medicine; Wake Forest Baptist Health Network | Winston-Salem, North Carolina, USA       | Non-author collaborator                                 |                                                                                            |

Supplemental Online Content: Nonauthor Collaborators

\*Indicates required information. Only first name, last name, and suffix will appear in PubMed.

| <b>*First Name and Middle Initial(s)</b> | <b>*Last Name</b> | <b>*Suffix (eg, Jr, III)</b> | Academic Degrees | Institution                                                                   | Location (city, state/province, country) | Role or Contribution, eg, chair, principal investigator | Group (if more than 1 Group listed in the byline) and/or Subgroup (eg, Steering Committee) |
|------------------------------------------|-------------------|------------------------------|------------------|-------------------------------------------------------------------------------|------------------------------------------|---------------------------------------------------------|--------------------------------------------------------------------------------------------|
| Rafael                                   | Mendoza           |                              |                  | Wake Forest University School of Medicine; Wake Forest Baptist Health Network | Winston-Salem, North Carolina, USA       | Non-author collaborator                                 |                                                                                            |
